# Supplementary material for: Identification of Putative Vaccine and Drug Targets against the Methicillin-Resistant Staphylococcus aureus by Reverse Vaccinology and Subtractive Genomics Approaches
Source: MDPI journal article supplement (doi:10.3390/molecules27072083), 2022-03-24
Supplement: s1 [file s1]

## Supplementary files

**Table S1.** Features of sixteen whole-genome sequences of methicillin-resistant *S. aureus* strains used for the identification of vaccine candidates and drug target proteins

| Strain ID    | MLST Type | Clonal complex (CC) | Size (bp) | GC%   | CDS  | Accession No. |
|--------------|-----------|---------------------|-----------|-------|------|---------------|
| SA G5        | ST45      | CC45                | 2760385   | 32.77 | 2689 | CP032160      |
| SA G6        | ST228     | CC5                 | 2856214   | 32.79 | 2734 | RAHA00000000  |
| SA G8        | ST225     | CC8                 | 2857863   | 32.81 | 2743 | QZFC00000000  |
| SA H27       | ST22      | CC22                | 2783185   | 32.73 | 2630 | CP032161      |
| SA H29       | ST8       | CC8                 | 2834624   | 32.65 | 2843 | CP032468      |
| SA H32       | ST22      | CC22                | 2786627   | 32.72 | 2657 | RAHP00000000  |
| NCTC 8325    | ST8       | CC8                 | 2821361   | 32.9  | 2872 | CP000253.1    |
| CA-347       | ST45      | CC45                | 2875156   | 32.9  | 2766 | CP006044.1    |
| ST228        | ST228     | CC5                 | 2783086   | 32.82 | 2654 | HE579071.1    |
| JH9          | ST105     | CC5                 | 2937129   | 32.9  | 2879 | CP000703.1    |
| Newman       | ST254     | CC8                 | 2878897   | 32.89 | 2854 | AP009351.1    |
| HO 5096 0412 | ST22      | CC22                | 2832299   | 32.8  | 2527 | HE681097.1    |
| Mu50 DNA     | ST5       | CC5                 | 2878529   | 32.87 | 2867 | BA000017.4    |
| MRSA252      | ST36      | CC30                | 2902619   | 32.80 | 2872 | BX571856.1    |
| H-EMRSA-15   | ST22      | CC22                | 2846320   | 32.80 | 2740 | CP007659      |
| DSM 20231    | ST8       | CC8                 | 2755072   | 32.88 | 2734 | CP011526.1    |

**Table S2.** Subtractive genome analysis of methicillin-resistant *S. aureus* strains

| Features                                   | Number of proteins |
|--------------------------------------------|--------------------|
| Core-genome                                | 1719               |
| Non-redundant proteins                     | 1678               |
| Essential core-proteins                    | 278                |
| Essential non-paralogous proteins          | 98                 |
| Cytoplasmic (CYT) proteins                 | 78                 |
| Secreted (SEC) proteins                    | 2                  |
| Potentially surface exposed (PSE) proteins | 6                  |
| Membrane (MEM) proteins                    | 12                 |

**Table S3.** Linear B-cell epitopes of 4 putative vaccine candidates of *S. aureus* determined by SVNTrip (20mers)

| Protein Name                        | Linear B-cell epitopes | Start-End | Score |
|-------------------------------------|------------------------|-----------|-------|
| Foldase protein (PrsA)              | DTMKKIGKDQIANASFTEML   | 45 - 64   | 1.000 |
|                                     | GEVSDVVKSSFYHIIKADK    | 226 - 245 | 0.438 |
|                                     | KMINKLIVPVTASALLGAC    | 2 - 21    | 0.366 |
|                                     | DFKDRDIKSVVEDKILNPEK   | 286 - 305 | 0.359 |
|                                     | YKENLRTAAYHKELLSDKIK   | 112 - 131 | 0.222 |
| ESAT-6 machinery protein (EssA)     | LTFLTASSNNGGLNIDVQQE   | 9 - 28    | 1.000 |
| Penicillin-binding protein 1 (PBP1) | YSSNTLMMHLQDLVGADKMK   | 367 - 386 | 1.000 |
|                                     | TYQDKLKIEKMNLPGISLLP   | 146 - 165 | 0.603 |
|                                     | STFKSYGLAAAIQEGAFDPD   | 314 - 333 | 0.502 |
|                                     | QSIKAGNKVLPFSKVLLTD    | 636 - 655 | 0.442 |
|                                     | KNKIGAVLLVGLFGLLFIL    | 10 - 29   | 0.410 |
|                                     | AFKPIMENTLKYLNVGKSKD   | 573 - 592 | 0.403 |
|                                     | KGSGFVSHQSISKGQKLEK    | 685 - 704 | 0.353 |
|                                     | FNPETGKDFGKKWANDLYQN   | 289 - 308 | 0.343 |
|                                     | KDLFAVMDAKTGEILAYSQ    | 266 - 285 | 0.336 |
|                                     | VERYKLVAIDKKASANSKK    | 80 - 99   | 0.303 |
| DD-transpeptidase (PBP2)            | TSHKAMSDYTAYMLAEMKLG   | 543 - 562 | 1.000 |
|                                     | KAQEAYLSYRLEQEYSKDDI   | 168 - 187 | 0.564 |
|                                     | ENVMSKISSRDGEDFKRPSS   | 649 - 668 | 0.425 |
|                                     | YKRLFGAIGKNLTGGFGSEG   | 126 - 145 | 0.377 |
|                                     | WEDAKKIDLKANLVNRTAEE   | 268 - 287 | 0.372 |
|                                     | KNKDQQVGATILDSKTGGLV   | 354 - 373 | 0.332 |
|                                     | KAAEDRKNTVLYLMHYHKRI   | 244 - 263 | 0.306 |
|                                     | YDKNGELVKTLDNQQRHEHV   | 78 - 97   | 0.290 |
|                                     | FKDENLGNVLQSGIKIYTNM   | 316 - 335 | 0.286 |
|                                     | GFSKVKQYGENSFVGHSSQQE  | 623 - 642 | 0.263 |

**Table S4.** Drug target prioritization parameters and functional analysis of eight protein targets.

| Protein Name                                               | Protein ID*    | Gene        | Length (aa) | Mo. Wt. (KDa) | Structural quality MHOLline | Function                                                                                                                                                                                                                                                                        |
|------------------------------------------------------------|----------------|-------------|-------------|---------------|-----------------------------|---------------------------------------------------------------------------------------------------------------------------------------------------------------------------------------------------------------------------------------------------------------------------------|
| Biotin protein ligase                                      | WP_000049913.1 | <i>birA</i> | 323         | 37.07         | Very High                   | <b>MF:</b> Biotin-[acetyl-CoA-carboxylase] ligase activity. <b>BF:</b> Protein biotinylation                                                                                                                                                                                    |
| HPr kinase/phosphorylase                                   | WP_000958224.1 | <i>hprK</i> | 310         | 34.48         | Very High                   | <b>MF:</b> ATP binding Source, magnesium ion binding, phosphorelay sensor kinase activity, protein serine/threonine/tyrosine kinase activity, protein serine/threonine kinase activity. <b>BF:</b> Carbohydrate metabolic process, regulation of carbohydrate metabolic process |
| Thymidylate kinase                                         | WP_001272126.1 | <i>tmk</i>  | 210         | 24.06         | Very High                   | <b>MF:</b> Thymidylate kinase activity. <b>BF:</b> Nucleotide biosynthesis                                                                                                                                                                                                      |
| Phosphate acetyltransferase                                | WP_000774281.1 | <i>pta</i>  | 328         | 34.98         | Very High                   | <b>MF:</b> Phosphate acetyltransferase activity, <b>BF:</b> Acetyl-CoA biosynthetic process                                                                                                                                                                                     |
| UDP-N-acetylmuramoyl-L-alanyl-D-glutamate--L-lysine ligase | WP_000340119.1 | <i>murE</i> | 494         | 54.21         | Very High                   | <b>MF:</b> UDP-N-acetylmuramoyl-L-alanyl-D-glutamate-L-lysine ligase activity. <b>BF:</b> Cell cycle, Cell division, Cell shape, Cell wall biogenesis/degradation, Peptidoglycan synthesis                                                                                      |
| UTP--glucose-1-phosphate uridylyltransferase               | WP_000721337.1 | <i>gtaB</i> | 288         | 32.49         | Very High                   | <b>MF:</b> UTP:glucose-1-phosphate uridylyltransferase activity. <b>BF:</b> Enterobacterial common antigen biosynthetic process, UDP-glucose metabolic process                                                                                                                  |
| Fatty acid/phospholipid synthesis                          | WP_000239744.1 | <i>plsX</i> | 328         | 35.43         | High                        | <b>MF:</b> Phosphate:acyl-[acyl carrier protein] acyltransferase activity. <b>BF:</b> Fatty acid biosynthetic process, phospholipid biosynthetic process                                                                                                                        |
| Pantothenate synthetase                                    | WP_000163742.1 | <i>panC</i> | 283         | 31.44         | Good                        | <b>MF:</b> ATP binding, pantoate-beta-alanine ligase activity. <b>BF:</b> Pantothenate biosynthesis                                                                                                                                                                             |

**Protein ID** represent the NCBI protein accession number, **MF** and **BF** represent Molecular function and biological function, respectively of the identified target proteins

**Table S5.** Identified druggable pocket with its volume, surface area and drug score of each target protein obtained from DoGSiteScorer.

| Target protein                                            | Volume (Å <sup>3</sup> ) | Surface area (Å <sup>2</sup> ) | Drug score  | Binding site residues                                                                                                                                                                                                                                                                                                                                                                                                                                                                                                                                            |
|-----------------------------------------------------------|--------------------------|--------------------------------|-------------|------------------------------------------------------------------------------------------------------------------------------------------------------------------------------------------------------------------------------------------------------------------------------------------------------------------------------------------------------------------------------------------------------------------------------------------------------------------------------------------------------------------------------------------------------------------|
| Biotin protein ligase                                     | 1425.15                  | 1648.25                        | 0.80        | SER93, THR94, GLN95, LEU96, LYS99, LN116, GLY119, ARG120, GLY121, <b>ARG122</b> , <b>ARG125</b> , HIS126, TRP127, SER128, SER129, SER130, GLN133, GLY134, LEU135, TRP136, MET137, SER138, SER148, MET149, ILE150, SER151, LYS152, ASN154, LEU155, ALA158, VAL175, LYS176, TRP177, PRO178, ASN179, ASP180, <b>TYR182</b> , LYS187, VAL188, GLY190, PHE191, LEU192, THR193, GLU194, GLY208, ILE209, GLY210, ASN212, GLN215, ASP219, PHE220, ILE224, <b>ARG227</b> , ALA228, TYR271, ASP301, GLY302, TYR303, LEU316, ILE317, SER318, ALA319, ASP320, ILE321, ASP322 |
| HPr kinase/phosphorylase                                  | 562.79                   | 751.65                         | 0.77        | VAL147, LEU148, ILE149, <b>THR150</b> , <b>GLY151</b> , ASP152, ILE155, LYS157, GLU159, THR160, GLU163, LEU226, <b>ASN227</b> , ILE228, <b>ASN229</b> , <b>LYS258</b> , <b>LYS259</b> , <b>THR260</b> , ILE261, VAL263, ARG267, ASN268, VAL269, ALA270, ILE273, ALA276                                                                                                                                                                                                                                                                                           |
| Thymidylate kinase                                        | 470.78                   | 479.38                         | 0.73        | ARG41, <b>GLU42</b> , PRO43, GLY49, ILE52, ARG53, VAL56, GLU67, ALA68, MET69, LEU70, PHE71, ALA72, SER74, <b>ARG75</b> , CYS95, ASP96, <b>ARG97</b> , TYR98, SER101, SER102, <b>TYR105</b> , <b>GLN106</b> , VAL117, LEU120, ASN121                                                                                                                                                                                                                                                                                                                              |
| Phosphate acetyltransferase                               | 415.87                   | 484.65                         | 0.77        | LYS143, THR149, ILE152, PHE153, PHE154, ILE163, GLU184, LYS187, SER188, SER191, PHE192, VAL292, VAL295, LEU296, GLN297, GLY298, <b>LEU299</b> , ASN300, SER301, PRO302, VAL303, ASN304, ILE321, <b>GLN325</b> , ALA326, LEU327, GLN328                                                                                                                                                                                                                                                                                                                           |
| UDP-N-acetylmuramoyl-L-alanyl-D-glutamate-L-lysine ligase | 703.09                   | <b>912.87</b>                  | <b>0.85</b> | <b>THR115</b> , ALA118, THR119, HIS122, LEU123, ARG126, LYS127, TYR134, ASN138, GLY139, PHE140, GLN141, ASN143, GLU144, LYS146, THR147, GLU330, PRO331, VAL332, GLU333                                                                                                                                                                                                                                                                                                                                                                                           |
| UTP-glucose-1-phosphate uridylyltransferase               | 430.21                   | <b>506.94</b>                  | <b>0.66</b> | GLY109, <b>LEU110</b> , GLY111, LEU130, ASP132, ASP133, TYR170, GLY171, PHE188, VAL189, GLU190, LYS191,                                                                                                                                                                                                                                                                                                                                                                                                                                                          |

|                                   |         |         |      |                                                                                                                                                                                                                                                                                                                                                                                                                                                                                                                                                                                                                                                                                                                                                |
|-----------------------------------|---------|---------|------|------------------------------------------------------------------------------------------------------------------------------------------------------------------------------------------------------------------------------------------------------------------------------------------------------------------------------------------------------------------------------------------------------------------------------------------------------------------------------------------------------------------------------------------------------------------------------------------------------------------------------------------------------------------------------------------------------------------------------------------------|
|                                   |         |         |      | ILE203, MET204, GLY205, TYR207, ASN226, ILE228, GLN229, LEU230, THR231, ILE234, ARG252, ASP254, GLY256                                                                                                                                                                                                                                                                                                                                                                                                                                                                                                                                                                                                                                         |
| Fatty acid/phospholipid synthesis | 2202.2  | 2922.41 | 0.82 | MET9, GLY11, ASP12, ASN13, PRO15, ILE59, GLU60, MET61, GLU62, MET77, SER94, ALA95, GLY96, ASN97, THR98, ALA100, LEU101, ILE112, VAL115, ALA119, LEU120, VAL121, VAL122, THR123, LEU124, PRO125, THR126, ILE127, ASP128, GLY129, LYS130, GLY131, PHE132, VAL133, PHE134, LEU135, VAL137, GLN150, GLN153, LEU154, ILE157, TYR158, ILE162, ARG163, ALA207, LYS208, LEU210, MET211, GLY225, ASN226, VAL228, LEU229, ASN231, LEU232, GLU233, THR235, ALA236, ALA258, ILE259, LEU260, LYS261, <b>LYS262</b> , ASP263, LEU264, ALA265, GLU266, PHE267, ALA268, LYS269, LYS270, MET271, ASP272, TYR273, TYR276, GLY277, GLY278, SER279, VAL280, LEU281, LEU282, HIS292, SER295, ASN296, LYS298, ALA299, TYR301, ALA303, ILE304, ALA307, ALA310, GLY311 |
| Pantothenate synthetase           | 1400.83 | 1071.11 | 0.81 | ILE28, PRO29, <b>THR30</b> , <b>MET31</b> , GLY32, <b>HIS35</b> , GLY37, HIS38, THR40, MET41, SER55, VAL56, PHE57, VAL58, ASN59, GLN62, PHE63, TYR72, PHE92, PRO94, MET99, LEU117, GLU118, ARG122, HIS125, PHE126, VAL129, VAL132, VAL133, LEU136, TYR146, PHE147, <b>GLY148</b> , LYS149, LYS150, ASP151, ALA152, GLN153, GLN154, ILE174, ASP175, ILE176, VAL177, ARG178, GLY182, LEU183, ALA184, LYS185, SER186, SER187, ARG188, ASN189, ALA200, VAL201, HIS202, LEU203, SER204, GLU242, PHE262, SER264, LEU265, ALA266, PHE269, ARG273, LEU274, ILE275, ASP276, ASN277                                                                                                                                                                      |

\*Amino acid with red color represent the amino acid residues involved in H-bond formation with respective ligand.

## Sequence file 1: Human\_Non-Homologous\_Essential\_protein sequences

>10 chromosomal replication initiator protein DnaA

MSEKEIWEKVLQAEKLSAVSYSTFLKDTELYTIKDGEAIVLSSIPFNANWLNQQAIEIIQAILFDVVGYEVKPHFITTEELANYSNNETATPKETTKPST  
ETTEDNHVLGREQFNAHNTFDFTVIGPGRNRFPHAAASLAVAEAPAKAYNPLFIYGGVGLGKTHLMHAIGHHVLDDNNPDAKVIYTSSEKFTNEFIKSIR  
DNEGEAFRERYRNIDVLLIDDIQFIQNKVQTQEEFFYTFNELHQNNKQIVISSDRPPKEIAQLEDRLRSRFEWGLIVDITPPDYETRMALQKKIEEEKLD  
IPPEALNYIANQIQSNIRELEGALTRLLAYSQLLGKPITTELTAEALKDIIQAPKSKKTIQDIQKIVGQYNNVRIEDFSAKKRTKSIAYPRQIAMYLSRELTD  
FSLPKIGEEFGGRDHTTVIHAHEKISKDLKEDPIFKQEVERLEKEIRNV

>20 DNA polymerase III, beta chain

MMEFTIKRDYFITQLNDTLKAISPRITLILTGIKIDAKEHEVILTGSSEISIEITIPKTVGDGDIVNISETGSVVLPGRRFFVDIIKKLPKGDVKLSTNEQFQT  
LITSGHSEFNLSGLDPDQYPLLPQVSRDDAIQLSVKVLKNVIAQTNAFVSTSETRPVLTVGNWLIQENELICTATDSHRLAVRKLQLEDVSENKNVIIPG  
KALAELENKIMSDNEEDIDIFFASNQVLFKVGNVNFISRLLEGHYPTTRLPENYEIKLSIDNGEFYHAIDRASLLAREGGNNVIKLTGDDVVELSSTSP  
EIGTVKEEVDANDVEGGLNKISFNSKYMMDALKAIDNDEVEVEFFGTMPKPKGDDSVTLILPIRTY

>DNA gyrase A subunit

LKEELLMAELPQSRINERNITSEMRESFLDYAMSVIVARALPDVRDGLKPVHRRILYGLNEQGMTPDKSYKKSARIVGDVMGKYHPHGDSSIEYAMV  
RMAQDFSYRYPLVDGQGNFGSMGMDGAAAMRYTEARMTKITLELLRDINKDTIDFIDNYDGNEREPSVLPARFPNLLANGASGIAVGMATNIPPH  
NLTELINGVLSKNPDISIAELMEDIEGPDFPTAGLILGSGIRRAYETGRGSIQMRSAVIEERGGRQIVVTEIPFQVKNKARMIEKIAELVRDKKID  
GITDLRDETSRLTGVRVVIDVRKIDANASVILNNLYKQTPQTSTFGVNMIALVNGRPKLINLKEALVHYLEHQKTVVRRRTQYNLRKAKDRAHILEGLRI  
ALDHIDEIISTIRESDDTKVAMESLQQRFLSEKQAQAILDMRLRLTGLERDKIEAENELLYISELAILADEEVLQLVRDELTEIDRFDDRRTEI  
QLGGFENLEDEDLPIEEQIVITLSHNNYIKRPLVSTYRAQNRGGRGVQGMNTEEDFVSQVLTLSTHDHVLFFTNKGRVYKLGVEVPELSRQSKGIP  
VVNAIELENDEVISTMIAVKDLESEDNLFVFATKRGVVKRSALSNFSRINRNGKIAISFREDELIAVRLTSGQEDILIGTSHASLIRFPESTLRPLGRTAT  
GVKGITLREGDEVVGLDVAHANSVDEVVVTENGYGKRTPVNDYRLSNRGGKGKITATITERNGNVVCITVTGEEDLMIVTNAGVIIRLDVADISQ  
NGRAAQGVRLIRLGGDDQFVSTVAKVKEDAEDETNEDEQSTSTVSEDGTEQQREAVVNDETPGNAIHEVIDSEENDEGRIEVRQDFMDRVEEDI  
QQSSDEE

>SAEMRSA100160 DnaB-like helicase

MDRMYEQNQMPPHNEAEQSVLGSIIIDPELINTTQEVLLPESFYRGHQAQHFIFRAMMHLNEDNKEIDVVTLMQDLSSEGLNEAGGPQYLAEIESTN  
VPTRNVQYYTIDIVSKHALKRRLIQTADSIANDGYNDELELDAILSDAERRILESSRESGDFKDIRDLVGLQVYETAEELDQNSGQTPGIPTGYRDL  
QMTAGFNRNDLIILAAARPSVGKTAFAFNIAQKVATHEDMYTVGIFSLMGADQLATRMICSSGNVDSNRLRTGTMTEEDWSRFTIAVGKLSRTKIFI  
DDTPGIRINDLRKCRRLKQEHGLDMIVIDYLLQIQQSGSRASDNRRQEQVEISRTLKALARELECPVIALSQLSRGVEQRQDKRPMMSDIRESGSIEQ  
DADIVAFLYRDDYYNRGGDEDDDDGGGFEPQTNDENGEIEIIIAKQRNGPTGTVKLHFMKQYNKFTDIDYAHADMM

>SAEMRSA100180 response regulator protein

MQMARKVVVVDDKEPIADILEFNLKKEGYDVYCAVDGNDVLDLIYEEEPDIVLLDIMLPGRDGMVEVCREVRKKYEMPIIMLTAKDSEIDKVLGLELG  
ADDYVTKPFSTRELIAVRKANLRRHYSQPAQDTGNVTNEITIKDIVIYPDAYSIKKRGEDIELTHREFELFHYLSKHMGMQVMTREHLLQTVWGYDYFG  
DVRTVDVTIRRLREKIEDDPSPHEIVTRRGVGYFLQQHE

>SAEMRSA103150 DNA-binding protein

VSELSKSEDQRITKTKYEQIKQIDISDIKPNPYQPRKTFDENHLNDLADSIKQYGILQPIVLRKTVQGYIVVGERRFRASKIAGLYKYSIIKDLTDEDM  
MELAVIENLQREDLNAIEEAESYQRLMTDLKITQQEVAKRLSKSRPIYANMLRLLHLPKKIADMVKDGRLTSAHGRTLLAIKDEQQMLRLAKRVVKEK  
WSVRYLENHVNELKNVSSKSETDKVDITKPKFIKQQRQLREQYGAQVDISIKKSVGKISFEFESQDDFVRRIIEQLNRKYGK

>SAEMRSA103210 putative single strand DNA-binding protein

MLNRVVLVGRITKDPYRTTPSGVSVATFTLAVNRTFTNAQGEREADFINCVFRRQADNVNNYLSKGLAGVDGRLQSRNYENQEGRRVFVTEV  
VCDVSVQFLEPKNAQQNGGQRQQNEFQDYGGGFGGQSGQNNNSYNSSNTKQSDNPFANANGPIDISDDDLFP

>NWMN 0446 thymidylate kinase

LRMNKMSAFITFEGPEGSGKTTVINEVYHRLVKDYDVIMTREPGGVPTGEEIRKIVLEGNDMDIRTEAMLFAASRREHLVLKIPALKEGKVVLCDRY  
IDSSLAYQGYARGIGVEEVRALNEFAINGLYPDLTILNVSAEVRERIIKNSRDQNRDLQEDLKFHEKVIIEGYQEIHNESQRFKSVNADQPLENVVE  
DTYQTIKYLEKI

>SAEMRSA104210 conserved hypothetical protein

MIYETAPAKINFITLDTLFRNDGYHEIEMIMTTVDLNDRLTFHKKRDKRIVVEIEHNYVPSNHKNLAYRAAQLFIEQYQLKQGVTSIDKEIPVSAGLA  
GGSDAAATLRGLNRLFDIGASLEELALLGSKIGTDIPFCIYNKTAICTGRGEKIEFLNKPSSAWVILAKPNLGISSPDIFKLINLDKRYDVHTKMCYEAL  
NRDYQQLCQSLSNRLEPISVSKHPQIDKLKNNMLKSGADGALMSGSGPTVYGLARKESQAKNIYNAVNGCCNEVYLVRLLG

>SAI7S6 1003710 50S ribosomal protein L25

MRMASLKSIIIRQKQTRSDLKQLRKSGKVPVVYGYGTKNVSVKVDEVEFIKVIREVGRNGVIELGVGSKTIKVMVADYQFDPLKNQITHIDFLAIN  
MSEERTVEVPVQLVGEAVGAKEGGVVEQPLFNLEVTATPDNIPEAIEVDITELNINDSLTVADVKTGDFKIENDSAESVTVVAPTEEPTTEEIEAM  
EGEQQTTEEPEVVGESKEDEEETEE

>SAEMRSA104350 conserved hypothetical protein

MLNSNGWHVDDHIVAVSTGIDSMCLLYQLNDYKDSYRKLTCLHVNHGVRASIEEARFLEVYCERHHIDLHIKKLDLSHSLDRNNSIQNEARIKR  
YEWFDMMNVLEADVLLTAHHLDDQLETIMYRIFNGKSTRNKLGFDELSKRKGQYIYRPLLAVSKKEIKQFQERYHIPYFEDESNDKNKYVRNDIRN  
RIIPAIDENNQLKVSHLLKLKQWHDEQYDILQYSAKQFIQEFVKFDEQSKYLEVSRQAFNNLPNSLKMVVLDCLLSKYYELFNISAKTYEWFQFSSK  
KAQFSINLTDKWIQIAYGKLIIMAKNNGDITYFRVQTIEKPGNYIFNKYRLEIHSNLPKCLFPLTVRTRQSGDTFKLNGRDGYKKVNRLFIDCKVQQWV  
RDQMPIVLDKQQRIIIVGDLYQQQTIKQWIIISKNGDE

>SAI7S6 1003810 Dihydropteroate synthase

MTTKKIMGILNVTPDFSDGGKFNNVETAINRVKAMIDEGADIIDVGGVSTRPGHEMVTLEEEELNRLVPVVEAIVGFDVKISVDTRSEVAEACLK  
GVDMINDQWAGLYDHRMFQIVAKYDAEIIIMHNGNGNRDEPVVEMLTSLAQAHQAKIAGIPSNKIWLDPGIGFAKTRNEEAEMARLDELVA  
TEYPVLLATSRKRFTKEMMGYDTPVERDEVTAATTAYGIMKGVRAVRVHNVELNAKLAKGIDFLKENENARHNL

>SAEMRSA104630 transcription antitermination protein

MSEEVGAKRWYAVHTYSGYENKVKNLEKRVESMNMTEQIFRVVPIEEENQVKDGKAKTTVKKTFPGYVLVELIMTDESWYVVRNTPGVTGFV  
GSAGAGSKPNPLPEEVRFILKQMGLEKKTIDVELEVGEQVRIKSGPFANQVGEVQEIEDKFKLTVLVDMMFGRETPVEVEFDQIEKL

>SAEMRSA104650 50S ribosomal protein L1

MAKKGKKYQEAASKVDRTQHYSVEEAIKLAKETSIAINFDAVEVAFRLGIDTRKNDQQIRGAVVLPNGTGKSQSVLVFAKGDKIAEAEAGADYVG  
EAEYVQKIQQGWFDVDFVATPDMMGVEVGLGRVLGPGLMPNPKTGTVTMDVKKAVEEIKAGKVEYRAEKAGIVHASIGKVSFTDEQLIENFN  
TLQDVLAKAKPSSAKGTIFYKSAVATTTMGPGVKIDTASF

>SAEMRSA104660 50S ribosomal protein L10

MSAIEAKKQLVDEIAEVLNSVSTVIVDYRGLTVAEVDLRSQLEAGVEYKVYKNTMVRRAAEKAGIEGLDEFLEGTPTAIATSSEDAFAAAKVISGF  
AKDHEALEIKSGVMEGNVITAEVKTGSLPSHDGLVSMLLSVLQAPVRNFAYAVKAIGEQQEESAE

>SAEMRSA105160 putative phosphate acetyltransferase

MADLLNVLDKLSGKNVIVLPEGEDERVLTAATQLQATDYVTPIVLGDETKVQSLAQKLNLDISNIELINPATSEFKAELVQSFVERRKKGATEEQAQ  
ELLNNVNYFGTMLVYAGKADGLVSGAAHSTGDTVRLPQIIKTKPGVSRSTGIFFMKIGDEQYIFGDCAINPELDSQGLAEIAVESAKSALSFGMDPK  
VAMLSFSTKGSASDDVTKVQEAVKLAQQKAEEKLEAIIIDGFEQFDAIIVPGVAEKAPGAKLQGDANVVFPSLEAGNIGYKIAQLGGYDAVG  
PVLQGLNSPVNDLSRGCSIEDVYNLSIITAAQALQ

>SAEMRSA106090 putative undecaprenol kinase

MFIIELIKGIILGVVEGLTEFAPVSSTGHMILVDDMWLKSSEFLGSQSFTFKIVIQLGVSFAAAWVFRERFLEILHIGKHKHVEGENDQQRSKPRRLN  
LLHVLVGMVPAGILGLLDFDIEEHLFSVPTVMIGLFGAIYMIADKYSKVNPNQTVDDQINYFQAFVIGISQAVAMWPGFSRSGSTISTGVLMKLN  
HKAASDFTFIMAVPIMLAASGLSLLKHYQDIQADIPFYILGLAFTVGLIAIKTFLHLINKIKLIPFAIRIVLVIFAILYFGFGIGKI

>SAEMRSA106580 ribonucleoside-diphosphate reductase beta chain

MIAVNWNTQEDMTNMFWRQNISQMWWETEFKVSKDIAWKTLSAEQDTFFKALAGLTGLDTHQADDGMPLVMLHTTDLRKKAVYSFMAM  
MEQIHAKSYSHIFTTLLPSSETNYLLDEWVLEPHLYKSDKIVANYHKLWGKEASIDQYMARVTSVLETFLFFSGFYPLLAGQKMTTSGEIIK  
ILLDESIGHVFTGLDAQHLRNELSESEKQKADQEMYKLLNDLYLNEESYTKMLYDDLIGITEDVLNVYKYNKALSNLGFEPYFEEREFPNIIENALDT  
TTKNHDFSVKGDGYVLALNVEALQDDDFVFDNK

>SAEMRSA106640 putative UDP-N-acetylenolpyruvoylglucosamine reductase

VINKDIYQALQQLIPNEKIKVDEPLKRYTYTKGGNADFYTPTKNEEVQAVVKYAYQNEIPVTVLGNGSNIIIEGGIRGIVISLLSDHIEVSDDAIIAGS  
GAAIIDVSRVARDYALTGLEFACGIPGSIGGAVYMNAGAYGGEVKDCIDYALCVNEQGSGLIKLTKELELDYRNSIIQKEHLVLEAAFTLAPGKMTET

QAKMDDLTERRESKQPLEYPSGVSFQRPPGHFAGKLIQDSNLQGHRIGGVEVSTKHAGFMVNVNDNGTATDYENLIHYVQKTVKEKFGIELNREV  
RIIGEHPKES

>SAEMRSA106790 preprotein translocase SecA subunit

MGFLSKILDGNNKEIKQLGKLADKVIALEEKTAITLDEEIRNKTQKFQTELADIDNVKKQNDYLDKILPEAYALVREGSKRVFNMTPTKVQIMGGIAIH  
KGDIAEMRTGEGKTLTATMPTYLNALAGRGVHVITVNEYLSSVQSEEMAELYNFLGLTVGLNLNSKTTEEKREAYAQDITYSTNNELGFDYLRDNM  
VNYSEDRVMRPLHFAIIDEVDSILIDEARTPLIISGEAEKSTSLYTQANVFAKMLKQDEDEKYDEKTKAVHLTEQGADKAERMFKVENLYDVQNVQDVI  
SHINTALRAHVTLQRDQVDMVVDGEVLVDQFTGRTPMPGRRFSEGLHQAIEAKEGVQIQNESKTMASITFQNYFRMYNKLAMGTGTAKTEEEEF  
NIYNMTVTQIPTNKPVRNDKSDLIYISQKGFDAVVEDVVEKHKAGQPVLLGTAVETSEYISNLLKRGIRHVDVLNAKNHEREAEIVAGAGQKGA  
VTIATNMAGRGTDIKLGEGVEELGGLAVIGTERHESRRIDDQLRGRSGRQGDGDSRFYLSLQDELMIRFGSERLQKMMSRLGLDDSTPIESKMVS  
RAVESAQKRVEGNNFDARKRILEYDEVLRKQREIYNERNISIIEEDSSQVVDAMLRLSTLQRSINYINTADDEPEYQPFIDYINDIFLQEGDITEDDIK  
KDAEDIFEVWAKIEAAYQSQKDILEEQMNEFERMILLRSIDSHWTDHIDTMDQLRQGIHLRSYAQQNPLRDYQNEGHLEFDIMMQNIIEEDTCKFI  
LKSVVQVEDNIEREKTTFEAKHVSADGKEKVKPKPIVKGQVGRNDDPCGSGKKFKNCHGK

>SAEMRSA106860 HPr kinase/phosphatase

MLTTEKLVETLKLDLIAGEEGLSKPIKNADISRPGLEMAGYFSHYASDRIQLLGTTELSFYNNLLPKDGRAGMRKLRPETPAIIVTRGLQPPEELVEAA  
KELNTPLIVAKDATTSLSMRSLTTFLEHALAKTTSLHGVLDVYGVGLITGDSGIGKSETALELVKRGHRLVADDNVEIRQINKDELIGKPPKLIHLEIR  
GLGIINVMTLFGAGSILTEKRIRLNINLENWNKQKLYDRVGLNEETLSILDTEITKKTIPVRPGRNVAVIEVAAMNYRLNIMGINTAEFSEERLNEEIIKN  
SHKSEE

>SAR081prolipoprotein diacylglycerol transferase

MGGIVFNIDPVAFNLGLPSVVRWYGIHIVGILLGYFVAQRALVKAGLHKDTLVDIIFYSALFGFIAARIYFVIFQWPYYAENPGEIIKIWHGGIAIHGGLI  
GGFIAGVIVCKVKNLNPFQIGDIVAPSILAQGIGRWGNFMNHEAHGGPVSRAFLEQLHLPNFIIENMYINGQYYHPTFLYESIWDVAGFIILVNIRKH  
LKLGETFFLYLTWYSIGRFFIEGLRTDSLMLTSNIRVAQLVSLILLISILIVYRIKYNPPLYSKVGALPWPTRKVK

>SAEMRSA107480 conserved hypothetical protein

MAKKAPDVGDKYGFHDDDSIFRSERGLTENIVREISNMKNEPEWMLDFRLKSLKLFYKMPMPQWGGDLSELNFDITYYVKPSEQAERSWDE  
VPKEIKRTFDKLGPEAEQKYLAVGSAQYSEVYHNMKELEEKGIIFKDTDSALQENEELFKKYFASVVPADNKFALNSAVWSSGFSIYVPKNIK  
LDTPLQAYFRINSENMGQFERTLIIADEGASVHYVEGCTAPVYTTSSLHSAVVEIIVHKDAHVRYYTIQNWANNVYNLVTKRTFVYENGMEWVDG  
NLGSKLTMYKPNVCVLLGEGAKGSTLSIAFAGKGQVQDAGAKMIHKAPNTSSTIVSKSISKNGGKVIYRGIVHFGRKAKGARSNIECDTLILDNESTDT  
IPYNEVFNDQISLEHAEKVSKVSEELFYLMRSGISEEEATEMIVMGFIEPTKELPMEYAVEMNRLIKFEMEESIG

>SAEMRSA108480 UDP-N-acetylmuramoylalanine-D-glutamate--2,6-diaminopimelate ligase

LDASTLFKKVKVVRVLSLEQIDITDTSRTAREGSIFVASVGYTVDSHKFCQNVADQGCKLVVNKEQ  
SLPANVTQVVPDTRLVASILAHTLYDPSHQLVTFGVTGTNGKTSIATMIHLIQRKLQKNSAYLGTNGF  
QINETKTKGANTTPETVSLTKIKEAVDAGAESMTLEVSSHGLVLGRLRGVEFDVAIFSNTLQDHLDFHG  
TMEAYGHAKSLFSQLGEDLSKEKYVVLNNDDSFSEYLRVTPYEVFSYGIDEEAQFMAKNIQESLQGV  
FDFVTPFGTYPVKSPYVGKFNISNIMAAMIAVWSKGTSLETIIKAIVENLEPVEGRLEVLDPSLPIDLIID  
YAHTADGMNKLIDAVQPFVKQLIFLVGMAGERDLTKTPEMGRVACRADYVIFTDPNPANDDPKMLTAE  
AKGATHQNYIEFDDRAEGIKHAIDIAEPGDTVVLASKGREPYQIMPGHIKVPHRDDLIGLEAAYKKFGGG  
PVDQ

>SAEMRSA109190 conserved hypothetical protein

MKQLHPNEVGVALGGLGEIGKNYAVEYKDEIVIDAGIKFPDDNLLGIDYVIPDYTYLVQNQDKIVGL  
FITHGHEDHIGGVFLLKQLNIPIYGGPLALGLIRNKLEEHLLRTAKLNEINEDSVIKSKHFTISFYLT  
THSIPETYGVIVDTPGKVVHTGDFKFDTPVGKPAKIAKMAQLGEEGVLCCLSDSTNSLVPDFTLSERE  
VGQNVDKIFRNCKGRIIFATFASNIYRVQAVEAAIKNNRKIVTFGRSMENNIKIGMELGYKAPPETFI  
EPNKINTVPKHELLILCTGSQGEPMMAALSRIANGTHKQIKIIPEDTVVFSSSPIPGNTKSINRTINSYK  
AGADVHSKISNIHSTGHGSQGDQQLMLRLIKPKYFLPIHGEYRMLKAHGETGVECGVEEDNVFIFDIGD  
VLALTHDSARKAGRIPSGNVLDGSGIGDIGNVVIRDRKLLSEGLVIVVVSIDFNTNKLSSGPDIIISRG  
FVYMRSGQLIYDAQRKIKTDVSKLNQNKDIQWHQIKSSIIETLQPYLFECTARKPMILPVIMKVNEQK  
ESNNK

>SaurJH9 1173 cell cycle protein



MTEYMKNFRSILRYIGKTSKFIDYPLLVTYIVLSLIGLVMVYSASMVPATKGTLTGGIDVPGTYFYNRQLAYVIMSFIIVFFIAFLMNVKLLSNIKVQKGM  
IITIVSLLLLTLVIGKDINGSKSWINLGMNLQASELLKIAIILYIPFMISKMKMPRVLSKPKLILSPIVLALGCTFLVFLQKDVGQTLILLIILVAIIFYSGIGVNVK  
LRFGIPAVLGFLVVFVIALMAGWLPSYLTARFSTLTDPFQFESGTGYHISNLLAIGNGGVFGKGLGNSAMKLGYLEPHTDFIAICEELGLIGLLVI  
TLEFFIVYRAFQFANKTSSYFYKLCVGIATYFGSQTFVNIGGISATIPLTGVPLPFISFGGSSMISLSIAMGLLLIVGKQIKVDQQRKKQQKQVDIRRF  
N

>SAEMRSA109800 putative glutamate racemase

MNKPIGVIDSGVGGLTVAKEIMRQLPNETIYLGDIGRCYPGRPGEQVKQYTVIEARKLMEFDIKMLVIACNTATAVALEYLQKTLSPVIGVIEPGA  
RTAIMTTRNQNVLLGTETIKSEAYRTHIKRINPHVEVHGACPGFVPLVEQMRYSOPTITSIVIHQTLKRWRNSESDEVILGCTHYPLLYKLIYDYFG  
GKKTVISSGLETAREVSALLTFSNEHASYTEHPDHRFFATGDPHTITNIIKEWLNLSVNVERISVND

>SAEMRSA110140 penicillin-binding protein 1

MAKQKIKIKKNKIGAVLLVLGLLFFILVLRISYIMITGHSNGQDLVMKANEEKYLKNAQQPERGKIYDRNGKVLAEDEVRYKLVAVIDKKASANSKK  
PRHVVDKKETAKKLSTVIDMKPEEIEKRLSQKKAQFIEFGRKGTNLTYQDKLIEKMNLPGISLLPETERFYPNGNFASHLIGRAQKNPDTGELKGALG  
VEKIFDSYLSGSGSLRYIHDIWGYIAPNTKKEKQPKRGDDVHLTIDSNIQVFVEEALDGMVERYQPKDLFAVVMDAKTGEILAYSQRPTFNPETGKD  
FGKKWANDLYQNTYEPGSTFKSYGLAAAIQEGAFDPDKKYKSGHRDIMGSRISDWNRVGVGWEIPMSLGFTYSSNTLMMHLQDLVGADKMMSW  
YERFGFGKSTKGMFMDGEAPGQIGWSNELQQKTSFSGQSTTVTPVQMLQAQSAFFNDGNMLKPWFVNSVENPVSKRQFYKGQKQIAGKPITKDT  
AEKVEKQLDLVNSKSKSHAANYRIDGYEVEGKTGTAQVAAPNGGGYVKGPNPYFVSFMDGAPKKNPKVIVYAGMSLAQKNDQEAYELGVSKAFK  
PIMENTLKYLVNGKSKDDTSNAEYSKVPDVEGQDKQKVIDNSAKSLEPVTIGTGTQIKAQSIKAGNKVLPKSVLILLTDGDLTMPDMTGWTKEDV  
IAFENLTNIKVNKSGSGFVSHQSISKQQLTEKDIDVEFSSENVDSNSTNNSDSNSDDKKKSDSKTDKDKSD

>SAEMRSA110150 phospho-N-acetylmuramoyl-pentapeptide-transferase

MIFVYALLALVITFVLVPLIPTLKRKMFQGSIREEGPQSHMKKTGTPTMGGLTFLLSIVITSLVAIIFVDQANPIILLFVTIGFGLIGFIDDIIVVKNNQ  
GLTSKQKFLAQIGIAIIFVLSNVFHLVNFSTSIHIFTNVAIPLSFAYVIFVWQVGFSAVNLTLDGLDGLATGLSIIGFTMYAIMSFVLGETAIGFICIM  
LFALLGFLPYNINPAKVFMDGTGSLALGGIFATISIMLNQELSLIFIGLVFIETLSVMLQVASFKLTGKRIFKMSPIHHHFELIGWSEWKVVTVFWAVG  
LISGLIGLWIGVH

>SAEMRSA110160 UDP-N-acetylmuramoylalanine--D-glutamate ligase

MLNYTGLENKNVLVVLGAKSGYEAALLSKLGANVTVNDGKDLSDQAHAKDLESMGIVSVSGSHPLTLLDNNPIIVKNPGIPYTVSIIDEAVKRGKIL  
TEVELSYLISEAPIAVTGTNGKTTVTSLIGDMFKKSRLTGRLSGNIGYVASKVAQEVKPTDYLVTELSSFQLLIGIEKYKPHIAITNIYSAHLDYHENLENY  
QNAKKQIYKNQTEEDYLICNYHQRVIESEELKAKTLFSTQQEVDGIYKDSFVYKGVRIINTEDLVLPGEHNLNLAVALACILAGVPIKAIDSLTTF  
SGIEHRLQYVGTNRTNKYYNDSKATNTLATQFALNSFNQPIIWLCCGLDRGNEFDELIPYMENVRAMVVFQGTAKAKFALGNSQGSVIEANNVE  
DAVDKVQDIIEPNDVLLSPACASWDQYSTFEERGEKFIERFRAHLPY

>SAEMRSA110170 putative cell division protein

LMDDKTKNDQQESNEDKDELELFRNTSKRRQRKRKATHFSNQNKDDTSQQTDFDEIYLINKDFKKE  
ESNDENNDSSASHANNNNIDSDTSDNIENEDYRYNQEIQQNESNGIAVDNEQPQSAPEQNSDSNDEET  
VTKKERKSKVTQLKPLTLEEKRLRRKRQKRIQYSVITILVLLIIVLIMFSPLSKIAHVNINGNNHVS  
TSKINKVLGVKNDSRMYTFSKKNAINDLEEDPLIKSVEIHKQLPNTLVNDITENEIALVKYKGGYLL  
ENGKLLKGSNDVKINDAPVMDGFGKTKEDDMIKALSEMTPVRRYIAEVYAPSKNKQSRIELFTTDGLQ  
VIGDISTISKMKYYPQMSQSLSDSSGKLKTRGYIDLSVGASFIPYRGNTSSQSESDKNVTKSSQEENQ  
AKEELQSVLNKINKQSSKNN

>AA076 0589 cell division protein FtsA

MEEHYVVSIDIGSSSVKTIVGEKFHNGINVIQTGQTYTSGIKNGLIDDFDIARQAIKDTIKKASIASGVD  
IKEVFLKLPITGEVYDESNEIDFYEDTEINGSHIEKVLGIREKNDVQETEVINVFPIRFIVDKENEVS  
DPKELIARHSLKVEAGVIAIQSILINMIKCEACGVVDVLDVYSDAYNYGSILTATEKELGACVIDIGED  
VTQVAFYERGELVDADSIEMAGRDIITDDIAQGLNTSYETAKEVKHQYGHAFYDSASDQDIFTVEQVDSDE  
TVQYTQKDLSDFIARVEEIFFEVFDVLQDLGLTKVNGGFIVTGGSANLLGVKELSDMVSEKVRHTPS  
QMGIRKPEFSSAISTISSIAFDELDDYVTINYHDNEETEDVIDVKDKDNESKLGGFDWFKRKTNNKDT  
HENEVESTDEEIQSEDNHQEHKQNEHVQDKDKKEESKFKKLMKSLFE

>SAEMRSA110190 cell division protein FtsZ

MLEFEQGFNHLATLKVIGVGGGGNNAVNRMIDHGMNNVEFIAINTDQALNLSKAESKIQIGELTRGLG

AGANPEIGKKAEESEREQIEDAIQGADMVFTSGMGGGTGTGAAPVVAKIAKEMGALTVGVVTRPFSFEG  
RKRQTQAAAGVEAMKAAVDTLIVPNDRLDIVDKSTPMMEAFKEADNVLRQGVQGISDLIAVSGEVNLD  
FADVKTIMSNQGSALMGIGVSSGENRAVEAAKKAISPLLETISIVGAQGVLMNITGGESLSLFEAQEAAD  
IVQDAADEDVNMI FGTVINPELQDEIVVTIATGFDKPTSHGRKSGSTGFGTSVNTSSNATSKDESFTS  
NSSNAQATDSVSERTHTTKEDDIPSFIRNREERSRTRRR

>SAEMRSA110290 lipoprotein signal peptidase

MHKKYFIGTSILIAVFVIFDQVTKYIATTMKIGDSFEVIPHLNITSHRNNGAAWGILSGKMTFFFI  
TIILIALVYFFIKDAQYNLFMQVAISLLFAGALGNFIDRILTGEVVDIFDTNIFGYDFPIFNIADSSLT  
IGVILIIALLKDTSNKKEKEVK

>SAEMRSA110540 conserved hypothetical protein

LKTGRIVKSISGVYQVDVNGERFNTKPRGLFRKKKFSPPVVDIVEFDVQVQINIEGYIHQVYERKNELKRPP  
VSNIDTLVIVMSAVEPNFSTQLLDRFLVIAHSYQLDARVLVTKDKTPIEQLEINELLKIYENIGYETE  
FIGNDDDRKKIVEAWPAGLIVLSGQSGVGKSTFLNHYRPELNLETNDISKSLNRGKHTRHVELFERQNG  
YIADTPGFSALDFDHIDKDEIKDYFLELNRYGETCKFRNCNHIKEPNCNVKHQLEIGNIAQFRYDHYLQL  
FNEISNRKVRY

>SAEMRSA110620 putative fatty acid synthesis protein

MVKLAIDMMGGDNAPDIVLEAVQKAVEDFKDLEILFGDEKKYNLNHERIEFRHCSEKIEMEDEPVRAIK  
RKKDSSMVKMAEAVKSGEADGCVSAGNTGALMSAGLFIVGRIKGVARPALVVTLPTIDGKGFVFLDVGAN  
ADAKPEHLLQYAQLGDIYAQKIRGIDNPISLLNIGTEPAKGNLSLTKSYELLNHDHSLNFVGNIEAKTL  
MDGDTDVVVTDGYTGMMVLKNLEGTAKSIGKMLKDTIMSSTKNKLAGAILKKDLAEFAKKMDYSEYGGSV  
LLGLEGTVVKAHGSSNAKAFYSAIRQAKIAGEQNIVQTMKETVGESNE

>SAI7S6 1009020 UMP kinase

VSSLLVYVYTIHDREDKKMAQISKYKRVLKLSGEALAGEKGFGINPVIKSVAEQVAEVAKMDCEIAVI  
VGGGNIWRGKTGSDLGMDRGATADYMGMLATVMNALALQDSLEQLDCDTRVLTSIEMKQVAEPYIRRAIR  
HLEKKRVVIFAAGIGNPYFSTDTTAALRAAEVEADVILMGKNNVDGVVSADPKVNKDAVKYEHLETHIQML  
QEGQLQVMDSTASSFCMDNNIPLTVFSIMEEGNIKRAVMGEKIGTLITK

>SAEMRSA110920 ribosome recycling factor

MSDIINETKSRMQKSIESLSRELANISAGRANSNLLNGVTVDYYGAPTPVQQLASINVPEARLLVISPYD  
KTSVADIEKAIIAANLGVNPTSDEGEVIRIAPALTEERRKERVKDVKKIGEEAKVSVRNIRRDMDQLKK  
DEKNGDITEDELRSGETDVQEATDNSIKEIDQMIADKEKDIMS

>SAEMRSA110970 DNA polymerase III PolC-type

LAMTEQQKFKVLADQIKISNQLDAEILNSGELTRIDVSNKNRTWEFHITLPQFLAHEDYLLFINAIEQEF  
KDIANVTCRFTVTNGTNQDEHVYKFGHCIDQTALSPKVKGQLKQKLIMSGKVLKVMVSNDIERNHFDK  
ACNGSLIAFRNCGFDIDKIFETNDNDQEQNLASLEAHIQEEDQSARLATEKLEKMKAEKAKQQDNNE  
SAVDKQIGKPIQIENIKPIESIEEYKVAIEGVIFDINLKLKSGRHIVEIKVTDYTDLSVLKMFTRK  
NKDDLEHFKALSVGKVVRAQGRIEEDTFIRDLVMMMSDIEEIKKATKKDKAEKRVFHLHTAMSQMDGI  
PNISAYVKQAADWGHAPAIATDHNVVQAFPDAAHAAEKHGKMIYGMGMLVDDGVPIAYKPQDVVLKDA  
TYVVFDEVTTGLSNQYDKIELAAVKVHNGEIIDKFERFSNPHRLSETIINLTHITDDMLVDAPEIEEV  
LTFEKEWVGDAIFVAHNASFDMGFIDTGYERLFGFPSTNGVIDTLELSTINTEYKGHGLNFLAKKYGVE  
LTQHHRAIYDTEATAYIFIKMVQMQKELGVLNHNINKLSNEDAYKRARPSHVTLIVQNQQGLKNLFKI  
VSASLVKYFYRTPRIPRSLDEYREGLLVGTACDEGELFTAVMQKDQSQVEKIAKYDFIEIQPPALYQD  
LIDRELIRDTELEIYQRLIHAGDTAGIPVIATGNAHYLFEHDGIARKILIASQPGNPLNRSTLPEAHF  
RTTDEMLNEFHFLGEEKAHEIVVKNTELADRIERVPIKDELYTPRMEGANEEIRELSYANARKLYGED  
LPQIVIDRLEKELKSIINGFAVIYLIQSRLVKKSLDDGYLVGSRGSGVGSFVATMTEITEVNPLPPHYI  
CPNCKRSEFFNDGSGVSGFDLPDKTCETCGAPLIKEGQDIPFETFLGFGDKVDPIDLNFSGEYQPNAHN  
YTKVLFGEDKVFRAGTIGTVAEKTAFGYVKGYLNDQGIHKGAEIDRLVKGCTGVKRTTGQHPGGIIVVP  
DYMDIYDFTPIQYPADDQNSAWMTTHDFHSHIDNVKLKLDILGHDDPTMIRMLQDLGIDPKTIPVDDKE  
VMQIFSTPESLGVTEILCKTGTFGVPEFGTGFVRQMLEDTKPTTFSELVQISGLSHGTDVWLGNQAQEL

IKTGICDLSSVIGCRDDIMVYLMYAGLEPSMAFKIMESVRKKGKGLTEEMIETMKENEVPDWYLDSCCLKIK  
YMFPAHAAAYVLMMAVRIAYFKVHHPLYYYASYFTIRASDFDLITMIKDKTSIRNTVKDMYSRYMDLGKK  
EKDVLTVLEIMNEMAHRGYRMQPISLEKSQAFEFIEGDTLIPPFISVPGLGENVAKRIVEARDDGPFLS  
KEDLNKKAGLSQKII EYLDELGSLPNLPDKAQLSIFDM

>SAEMRSA111050 putative riboflavin biosynthesis protein

MKVIEVTHPIQSKQYITEDVAMAFGFFDGMHKGHDKVFILNEIAEARSLLKAVMTFDPHPSVVLNPKRK  
RTTYLTPLSDKIEKISQHDIDYCVVNFSSRFANVSVEDEFVENYIIKNNVKEVIAGFDFTFGKFGKGNMT  
VLQEYDAFNTTIVSKQEIENEKISTTSIRQDLINGELQKANDALGYIYSIKGTVVQGEKRGRTIGFPTAN  
IQPSDDYLLPRKGVYAVSIEIGTENKLYRGVANIGVKPTFHDPNKAEVVIEVNIFDFEDNIYGERVTNVW  
HHFLRPEIKFDGIDPLVKQMNDKSRKAYLLAVDFGDEVAYNI

>SAI7S6 1009170 DNA translocase FtsK

VRQLAQAKKKSTAKKKTASKKRTNSRKKKNDNPIRYVIAILVVVLMVLGVFQLGIIGRLIDSFFNYLFGY  
SRYLTYLVLATGFTYYSKRIPKTRRTAGSIVLQJALLFVSQVLVHFNSGIKAEREPVLSYVYQSYQHS  
HFPNFGGGVGLGFYLLELSPVLSLFGVCITILLCSSVILLTNHQHRDVAKVALENIKAWFGSFKNEKMS  
ERNQEKQLKREEKARLKEEQKARQNEQPQIKDVSDFTEVPQERDIPYGHTEENESKQCQPSRKRVFDA  
ENSSNNIVNHQADQQEQLETEQTHNSVESENTIEEAGEVTNVSVVPPVPLTLNQPQKQKATSKAEVQRKGQ  
VLENTLKDFGVNAKVTQIKIGPAVTQYEQPAQGVKVSIVNLHNDIALALAAKDVRIEAPIGRSAVGI  
EVPNEKISLVSLEVLDEKFPSSNNKLEVLGRDISGDPITVPLNEMPHLLVAGSTGSGKSVCSINGIITSI  
LLNAKPHEVKMLMIDPKMVLELVNYPHLLIPVVTNPHKAAQALEKIVAEMERRYDLFQHSSTRNIKGY  
NELIRKQNQELDEKQPELPYIVVIVDELADLMMVAGKEVENAIQIRITQMARAAAGIHLIVATQRPVSDVIT  
GIKNNIPSRIAFAVSSQDTSRTIIGTGAELKLGKGMVYVNGDSSQTRIQQAFGLSDQEVQDVVNYVV  
EQQQANYVKEIEPDAPVDKSEMKSSEDALYDEAYLFVVEQQKASTSLLQRQFRIGYNRASRLMDDLERNQV  
IGPQKGSKPRQVLIDLNNDEV

>SAEMRSA112010 putative membrane protein

MMIIVMLLSYLIGAFPSGFVIGLFFKKDIRQFGSGNTGATNSFRVLGRPAGFLVTFDLIFKGFITVFF  
PLWLVPVHADGPSTFTFTNGLIVGLCAILGHVYPVYLKFQGGKAVATSAGVVLGVNPILLILAIIFVVL  
KIFYVSLASIVAAICCVIGSLIQDYILLVVSFLVSIILIRHSNIARIFRGEPEKIKWM

>SAEMRSA112200 tryptophan synthase beta chain

MNKQIQTEADELFFGEYGGQYVPETLMPAIELKKAYKEAKADPEFQRELYYLSEYVGRATPLTYAAS  
YTESLGGAKIYKREDLNHTGAHKINNALGQALLAKRMGKKKLVAETGAGQHGVASATVAALFDMELVVF  
MGSEDIKRQQLNVFRMELLGAKVVAVEDGQGTLSDAVNKALQYVWVSHVDDTHYLLGSALGPDPPFTIVRD  
FQSVIGKEIKSILKKEGRLPDAIVACIGGGSNAIGTFYPIKDDVALYGVAAAGQGEDTDKHALAIGKG  
SPGVLHGTKMYLIQDEGGQVQLAHSISAGLDYPGIGPEHSYYHDIGRVTFENASDTQAMNALINFTEKHEG  
IIPAIESAHALSYVERLAPTMSEKEDIIIVVTISGRGDKDMETIRQYMAERGLAND

>SAEMRSA112560 aspartokinase II

MVTRSVLKFGSSVSDFTKIKRIAEMLKERVNQDEQLIVVVSAMGNTTDQLMTNVSTLTAKPKQELALL  
LTTGEQQTVSYSMLVNDIGVNAKAMTGYQAGIKTIGHHLKSKIAQINPQTFEQAFQENDILVVAGFQGI  
NEHQELTTLGRGSDTTAVALAVSNQIPCEIYTDVDGVYATDPRLLPKAKRLDIVSYEEMMEMSALGAGV  
LETRVELAKNYNIPLYLGTLSNVKGTWIMSNEEILEKKAVTGVALDKHMMHVTISYPLPDNQLLTQLF  
TELEEGAVNVDMISQIVNLDGLQLSFTIKDSDFHQISMILETLKNQYALAYKINEHYVKISLIGSGMRD  
MSGVASKAFLTLIENNIPFYQTTTSEISISYVIDDFNGQQAVEKLYDAFNI

>SAEMRSA112570 aspartate semialdehyde dehydrogenase

MTKLAVVGATGLVGTKMLETNLNRKNIPFDELVLFSARSAGQEVFEQEKTYTVQELTDARASEHFDYVLM  
SAGGGTSEHFAPLFEKAGAVIDNSSQWRMAEDIDLIVPEVNEPTFTRGIIANPNCSTIQSVVPLKVLQD  
AYGLKRVAYTTYQAVSGSGMKGKKDLAEGVNGKAPEAYPHPIYNNVLPIDVFLNGYTKKEEQKMIDETR  
KILNAPDLKVTATCARVPVQDSHSVEIDVTLDEKATAEDIKALFDQDDRVLVDNPNENNEYPMAINSTNK  
DEVFVGRIRRDDSLNTFHVWCTSDNLLKGAALNAVQVLEQVMRLKGAN

>SAEMRSA112590 dihydrodipicolinate reductase

VKILLIGYGAMNQVRVARLAEKGHEIVGVIENTPKATTPYQQYQHIADVVDADVAIDFSNPNFLPLDE  
EFHPLVAVTTGEKEKLLNKDELSQLNMPVFFSANMSYGVYALTKILAAVPLDDFDIELTEAHNNKKV  
DAPSGTLEKLYDVIVSLKENVTPVYDRHELNEKRQPDIGIHSIRGGTIVGEHEVLFAGTDETIQITHRA  
QSKDIFANGAIQAAERLVNKPNGLYTFDNL

>SAEMRSA112600 putative tetrahydrodipicolinate acetyltransferase

MVQHLTAEEIIQYISDAKKSTPIKVYLNNGNFEGITYPESFKVFGSEQSKVIFCEADDWKPFYEAYGSQFE  
DIEIEMDRRNSAIPKDLTNTNARIEPGAFIREQAIIEDGAVVMMGATINIGAVVGEGTMIDMNATLGGR  
ATTGKNVHVGAGAVLAGVIEPPSASPVIIEDDVLIGANAVILEGVRVGKGAIVAAGAIVTQDVPAGAVVA  
GTPAKVIKQASEVQDTKKEIVAALRLND

>SAEMRSA112810 putative UDP-N-acetylglucosamine-N-acetylmuramyl-(pentapeptide)pyr ophosphoryl-undecaprenol N-acetylglucosamine transferase

MKKIAFTGGGTGVHVSVNLSLIPTALSQGYEALYIGSKNGIEREMIESQLPEIKYYPISSGKLRRYISLE  
NAKDVFVKVLKGLDARKVLKKEKPDLLFSKGGFVSPVVIAAKSLNIPTIIHESDLTPGLANKIALKFAK  
KIYTTFEETLNYLPKEKADFIGATIREDLKNGNAHNGYQLTGFNENKKVLLVMGGSLSGSKKLNSIIRENL  
DALLQQYQVHIHTGKGLKDAQVKKSGYIQYEFVKEELTDLLAITDVTISRAGSNAIYEFLLTRIPMLLVP  
LGLDQSRGDQIDNANHFADKGYAKAIDEEQLTAQILLQELNEMEQUERTRIINNMSYEQSYTKEALFDKM  
IKDALN

>SAEMRSA113110 penicillin-binding protein 2

MTENKGSSQPKNGNNGGKSNSKKNRNVKRTIIIGFMIIAFFVLLGILLFAYYAWKAPAFTEAKLQ  
DPIPAKIYDKNGELVKTLDNQGRHEHVNLKDVPKSMKDAVLATEDNRFYEHGALDYKRLFGAIGKNLTGG  
FGSEGASTLTQQVVKDAFLSQHKSIGRKAQEAYLSYRLEQEYSKDDIFQVYLNKIYSDGVTGIKAAKY  
YFNKDLKDLNLAEAYLAGLPQVPNNYNIYDHPKAAEDRKNTVLYLMHYHKRITDKQWEDAKKIDLKANL  
VNRTEAERQNIIDTNDQSEYNSYVNFVKSELMNNKAFKDENLGNVLQSGIKIYTNMDKDVQKTLQNDVDNG  
SFYKNKDQQVGATILDSKTGGLVAISGGRDFKDVVNRNQATDPHPTGSSLKPLAYGPAIENMKWATNHA  
IQDESSYQVDGSTFRNYDVKSHGTYSIDALRQSFNIPALKAWQSVKQNAAGNDAPKKFAAKLGLNIEGDI  
GPSEVLGGSASEFSPTQLASAFAAIANGGTYNNAHSIQKVVTDRGETIEYDHTSHKAMSDYTAYMLAEML  
KGTFTKPYGSAYGHGVSGVNMGAKTGTGTGYAETYSQYNLPDAAKDVWINGFTPQYTMSVWMGFSKVKQY  
GENSFVGHSSQEQEYPFLYENVMKISSRDGEDFKRPSSVSGSIPSINVSGSQDNNTNRSAGGSDTSAN  
SSGTAQSNNTNRSQQSRNSGGLTGIFN

>SAEMRSA113140 conserved hypothetical protein

MDKYQLKARPVVIRRELDHYSIDLGLDEQDLVILLKLIYASETSNKQPSIELLQKGSTMQPRDITMVIQN  
LIQRELLELQVQKDEEGRFTEYMNLDPFEEKLSHLKQSQMETKEQNSKEFKQLFRVLEDTFARPLSPY  
EIELTNQWIDVDKHDTAIIQAALDEANSLNLSFKYMDRILLNWKKNNVKTIDDSRKIREKFNKPKMTHT  
VKTVPKFDWLNENLDGK

>SAEMRSA113270 chorismate synthase

MRYLTSGESHGPQLTVIVEGIPANLEIKVEDINKEMFKRQGGYGRGRRMQIEKDTVEIVSGVRNGYTLGS  
PITMVVTNDDFTHWRKIMGAAPISDEERENMKRTITKPRPGHADLVGGMKYNHRDLRNVLERSSARETAA  
RVAVGALCKVLEQLDIEIYSRVVEIGGIKDKDFYDSETFKANLDRNDVRVIDDGIAQAMRDKIDEAKND  
GDSIGGVVQVVENMPVGVGSYVHYDRKLDGRIAQGVVSINAFKGVSFGEFGKAAEKPGEIQDEILYNT  
ELGYYRGSNHLGGLEGMSNGMPIIVNGVMKPIPTLYKPLNSVDINTKEDFKATIERSDSCAVPAASIVC  
EHVVAFEIAKALLEEFQSNHIEQLKQKQIERRQLNIEF

>SAEMRSA113370 cytidylate kinase

MKAINIALDGPAAGKSTIAKRVASELSMIYVDTGAMYRALTYKYLKLNKTEDFAKLVDQTTLDTLYKAD  
KGQCVIDNEDVTDFLRNNVDVTQHVSYVASKEPVRSFAVKKQKELAAEKGIVMDGRDIGTVVLPDADLV  
YMIASVEERAERRYKDNQLRGIESNFEDLKRDIARDQYDMNREISPLRKADDAVTLDTTGKSIEEVTDE  
ILAMVSKIK

>SAEMRSA114480 biotin carboxyl carrier protein of acetyl-CoA carboxylase

MNFKEIKELIILDKSTLTINIEDTKGKVTLLKKEKETEITPQISQMPVEAAAMPMPQVQSTDSNKTEA  
PKPTSDNHKTINAPMVGTFYKSPSPDEEAYVQVGDTVSNETTVCILEAMKLFNEIQAEISGEIVEILVED  
GQMVEYGQPLFKVK

>SAEMRSA114490 putative elongation factor P

MISVNDFKTGLTISVDNAIWKVIDFQHVKPGKGSFVRSKLRNLRTGAIQEKTFRAGEKVEPAMIENRRM  
QYLYADGDNHVFMDNESFEQTESSDYLKEELNYLKEGMEVQIQTYEGETIGVELPKTVELTVTETEPGI  
KGDATGATKSATVETGYTLNVPLFVNEGDLIINTGDGSYISRG

>SAEMRSA114580 putative shikimate kinase

MNHDKSPIILIGFMGTGKSTIGKYVADEQNLSFIDIDSYIEEKYKLTIPFISKHGEQYFRNLEFTCLQE  
CINTADIIATGGGIIIEEAFNFKLNQKNIIWLDCNIDIYSRINDDPHRPNANNKTIMQLNDLYCSRIL  
RYNEIAFKKFDHLLSISEIYYELLNLIKASDQY

>SAEMRSA114820 DNA primase

LRIDQSIINEIKDKTDILDLVSEYVKLEKGRNYIGLCPHFHDEKTPSFTVSEDKQICHCFGCKKGGNVFQ  
FTQEIKDISFVEAVKELGDRVNVAVDIEATQSNVQIASDDLQMIEMHELIQEFYYYALTKTVEGEQAL  
TYLQERGFDTALIKERGIGFAPDSSHCHDFLQKKGYDIELAYEAGLLSRNEENFSYYDRFRNRIMFPLK  
NAQGRIVGYSGRTYTQGEPKYLNSPETPIFQKRKLLYNLDKARKSIRKLDEIVLLEGFMDVIKSDTAGLK  
NVVATMGTTQLSDEHITFIRKLTSNITLMFDGDFAGSEATLKTGQHLLQQGLNVFVIQLPSGMDPDEYIGK  
YGNDAFTTFVKNDKKSFAHYKVYKDEIAHNDLSYERYLKELSHDISLMKSSILQQKAINDVAPFFNV  
PEQLANEIQFNQAPANYPPEDEYGGYDEYGGYIEPEPIGMAQFDNLSRQEKAERAFKLHLMRDKDTFLNY  
YESVDKDNFTNQHFYVFEVLHDFYAENDQYNISDAVQYVNSNELRETLSLEQYNLNDEPYENEIDDYV  
NVINEKGQETIESLNHKLREATRIGDVELQKYYLQQIVAKNKERM

>SAEMRSA115060 conserved hypothetical protein

MSDNIVAIYGDVPVELVEKQSAEISQFLKSDRDDFNFKYNLYETEIAPIVEETLTPFFSDKKAILVKN  
AYIFTGEKAPKDMAHNVQDLIEFIEKYDGENLIVFEIYQNKLDERKKLTCTLKKHARLKKIEQMSEEEIK  
KWIQSKLNENFKDIKRDALDLFIELTGINFNIVSQEIEKLILFLGDRPTINKQDVNQIINRSLEQNVFLL  
TEYIQRKKEQAIHLVKDLITMKEEPIKLLALITSNYRLFYQCKILSQKGYSGQQIAKTIGVHPYRVKLA  
LGQVRHYQLDELLNIIDACAETDYKLKSSYMDKQLILELFILSL

>SAEMRSA115130 conserved hypothetical protein

MKKIVLYGGQFNPIHTAHMIVASEVFHELQPDEFYFLPSFMSPLKKHNNFIDVQHRLTMIQMIIDELGFG  
DICDDEIKRGGQSYTYDTIKAFKEQHKSLEYFVIGTDQYNQLEKWKYQIEYLKEMVTFVVVNRDKNSQNV  
ENAMIAIQIPRVDISSTMIRQVSEKSIQVLVPKSVENYIKGEGLYEH

>SAEMRSA115170 conserved hypothetical protein

MGLVRKFFMPNSYVQSIFQIDLKLDKGVKGIITDLNTLVGWDVKEPTERVKAWFKEANEKGITITIV  
SNNNESRVASFQHLIDIFIKARKPMGKAFDKAITKMNIRPDQTVVIGDQMLTDVFGGNRRGLYTIMVV  
PVKRTDGFITKFNRLIERLLRHFSKKGYITWEEN

>SAEMRSA115280 transcription elongation factor

MENQKQYPMTQEGFEKLERELEELKTVKRPEVVEKIKVARSFGLDSENSEYDAAKDEQGFIEQDIQRIEH  
MLRNALIEDTGDNNVVKIGKTVTFVELPGDEEESYQIVGSAESDAFNGKISNESPMAKALIGKGLDDEV  
RVPLPNGGEMNVKIVNIQ

>SAEMRSA115540 putative protein-export membrane protein

VKKSSRIIAFLLLVLLFAGMAATYKSVIKNVNLGLDLQGGFEVLYQVDPLNKGDKIDKKALQSTAQTLE  
NRVNVLVGVSEPKIQVEEPNRIRVQLAGVTDQNEARKILSSQANLTIRDAEDKVKLSGSDIKQGSQAKQEFK  
QETNQPTVTFKVKDKNKKFKVTETEEKRDNVMVVWLDFFKKGDSYKKEAQKKNPKFISAASVDQPINSDS  
VEISGGFGKGQEGVKKAKQIAELLNAGSLPVDLKEIYSNSVGAQFGQDALDKTVFASFIGVALIYLFMLGF  
YRLPGLVAIIALTTYIYTLVAFNFISGVLTLPLAALVLGVGMAVDANIIMYERIKDELIRGRTIKQAF

SKANKSSFLTIFDSNLTIVIAAAVLFFFGESSVKGFATMLLLGILMIFVTAVFLSRFLLSLLVSSNIFKN  
 QFWLFGVKKNRHDINEGVDVHDLKTSFEKWNFVKLAKPLIGVSILIVVGLVILYIFKLNLDGIDFSSGT  
 RVDFQSKQAITQQKVEQVVKDSGLKADQIQINGKDNKVATVQFKDDLTRAQDNKLSDNKSKFGDTPQIN  
 TVSPIIGQELAKNAMLALYASIGIIIVSLRFEWRMGLSSVLALLHVDVFIIVAFSLFRIEVDLTFIAA  
 VLTIVGYSINDTIVTFDRVRENQKVKVITTEQIDDIVNRSIRQTMTRSINTVLTIVVVVAILFFGAP  
 TIFNFTLALFIGLISGVFSSIFIAVPLWGIMKKRQLKKSPPKHKLVVYKEKKSNDKILV

>SAEMRSA115590 Holliday junction DNA helicase RuvA  
 MYAYVKGKLTHTLYPTHVVVETAGVGYEQTPNSYRFQKQLDHEVLIHTSLIVREDAQLLYGFSSEEEKDM  
 FLSLIKVTGIGPKSALAILATSTPNEVKRAIENENDTYLTKFPGIGKKTARQIVLDLKGKVKITEEDSDS  
 LLQVDATSTVQDQFVQEAMLALEALGYSKRELAKVEKTLNKNKYDSVDEAVKAGLQLVVS

>SaurJH9 1738 bacterial translation initiation factor 3 (bIF-3)  
 VYKEERVYFYTSSFLGANFVKILEVSTIAKDQQTQINDKIRAKELRLIGQDGEQIGVKSREALEMAERV  
 DLDLVVAPNAKPPVARIMDYGKFFEQKKKEKEMKKKQKIINVKEIRLSPTIEEHDFQTKLKNGRKFLT  
 KGDKCKVSIRFRGRAITHKEIGQRVLEKYADECKDIATVEQPKMDGRQMFIMLAPTAEK

>SAEMRSA115950 chromosome replication initiation/membrane attachment protein  
 MGRQAFEFGLRPKDQFVQMQLHFDLNTNHLEVLNRLYTPLIGTQAVGLYHFMQTQFVKESHNETLILSHYIF  
 MNELKINLLEFRQQMDLLEAIGLLKAFVKHDEQETQFVYQLIQPPSAHLFFNDPMLSIFLYSEVEHRRFH  
 ELKKYFEYQQIDLSEFKQVTRQFTDVFKVPSTKIDIDTSDIPINEPYQGIDLSNESFDFEMLRQMLGKHF  
 ISQDIVTKDAKRLITQLATLYGLTADGMKHVILNSITSGQQLSFEEMRKQARSYYLMEHENQMPKLQVKS  
 PVTSSSTGKSSEVNPKPQSDWEFELLEQTSPIDMLASWSEPTISQKTMVEELIEREKMSFGVINILLQ  
 FVMLKEDMKLPKAYILEIASNWKKGKIKTAKEAYNYAKKVNQPKNEGSSGNYQKRGSYGQRNRISKEKT  
 PKWLENRDKPSEEDSAKDNSVDDQQLQEQDRQAFDLKLSKKWEEDSQ

>SAEMRSA116120 DNA polymerase III alpha subunit  
 MVAYLNIHTAYDLLNSSLKIEDAVRLAVSENVDAITDTNVLYGFPKFYDTCIANNIKPIFGMTIYVTN  
 GLNTVETVVLAKNNDGLKDLYLQSSSEIKMNALEHVSFELLKRFSNNMIIIFKNVADEHRDIVQVFDSDHED  
 TYLDHRSVLVQGKIKHVVQNCYQTRQDADTISALAAIRDNTKLDLIHQDEDFGAHFLTENEIQQLDVNQ  
 EYLTQVDVIAQCNALKYHQSLLPQYQTPNDESAKKYLWRVLVTQLKLELNYDVYLERLKYEYKVTN  
 MGFEDYFLIVSDLIHAKTHDVMVGPGRGSSAGSLVSYLLGITTIDPIKFNLLFERFLNPERVTMPDIDI  
 DFEDTRRERVYQVQEKYELHVSIGIVTFGHLLARAVARDVGRIMGFDEVTLNEISSLIPIHLGITLDEA  
 YQIDDFKKFVHRNHRHERWFSICKKLEGLPRHTSTHAAGIIINDHPLYEAPLTKGDTGLLTQWTMTEAE  
 RIGLLKIDFLGLRNLSIIHQILTQVKKDLGINIDIENIPFDDQKVFELLSQGDGTTGIFQLES DGVRSVLK  
 KKKPEHFEDIVAVTSLYRPGPMEEIPTYITRRHDPKSVQYLPHLEPIKNTYGVIIYQEIMQIASTFA  
 NFSYGEADILRRAMSKKNRAVLESERQHFIEGAKQNGYHEDISKQIFDLILKFADYGFRAHVSYSKIA  
 YIMSYLKVRYPNYFYANILSNVIGSEKKAQMIEEAKKQGITILPPNINESHCYKPSQEGIYLSIGTIK  
 GVGYSQSVKVVVDERYQNGKFDFFDARRIPKRVKTRKLEALILVGAFDAFGKTRSTLLQAIDQVLDGD  
 LNIEQDGLFDILTPKQMYEDKEELPDALISQYEKEYLGFYVSQHPVDKKFVAKQYLTIFKLSNAQNPKP  
 ILVQFDKVKQIRTKNGQNMFAVTLNDGIETLDGVIFPNQFKYEELSHNDLFIVSGKFDLRKQQRQLII  
 NEIQTATFEEQKLAFQAKIIRNKSHIDAFEEAIKATKENANDVVL SFYDETQKMTTLGYINQKDSMF  
 NNFIQSFNPSDIRLI

>SAEMRSA116260 putative septation ring formation regulator  
 MVLYIILAIIVIIIAVGVLFYLRSNKRQIIIEKAIERKNEIETLPFDQNLQSLKLNKGETKTKYDAMK  
 KDNVESTNKYLAPVEEKIHNAEALLDKFSFNAAQSEIDDANELMDSYEQSYQQQLEDVNEIALYKDNDE  
 LYDKCKVDYREMKRDVLANRHQFGEAASLLETEIEKFEPRELYEVKADGNYVQAHNHIAALNEQMKQL  
 RSYMEEIPELIRETQKELPGQFQDLKYGCRDLKVEGYDLHVKVDSTLQSLKTELSFVEPLISRLELEEA  
 NDKLANINDKLDMMYDLIEHEVKAKNDVEETKDIITDNLFKAKDMNYTLQTEIEYVRENYIYINESDAQSV  
 RQFENEIQSLISVYDDILKEMSKSAVRYSEVQDNLQYLEDHVTVINDKQEKLNHLIQLREDEAEADNL  
 LRVQSKKEEVYRRLLASNLTSVPERFIIMKNEIDHEVRDVNEQFSEPIHVKQLKDKVSKIVIQMNTFED  
 EANDVLVNAVYAEKLIQYGNRYRKDYSNVDKSLNEAERLFKNNRYKRAIEIAEQALESVEPGVTKHIEEE  
 VIKQ

>SAI7S6 1012790 UDP-N-acetylmuramate--L-alanine ligase

MSKEFYIMTHYHFVGIKSGMSSLAQIMHDLGHEVQGSIDIENYVFTEVALRNKGIKILPFDANNIKEDMV  
VIQGNFASSHEEIVRAHQLKLDVVSYNDFLGQIIDQYTSVAVTGAHGKTSTTGLLSHVMNGDKKTSFLI  
GDGTGMGLPESDYFAFEACEYRRHFLSYKPDYAIMTNIDFDHPDYFKDINDVDFDAFQEMAHNVKKGIIAW  
GDDEHLRKIEADVPIYYYGFKSDDDIYAQNIQITDKGTAFDVYVDGEFYDHFSLPQYGDHTVLNALAVIA  
ISYLEKLDVTNIKEALETFGGVKRRFNETTIANQVIVDDYAHHPREISATIETARKKYPHKEVVAVFQPH  
TFSRTQAFLENEAESLSKADRVFLCEIFGSIRENTGALTIQDLIDKIEGASLINEDSINVLEQFDNAVVL  
FMGAGDIQKLQNAYLDKLGKMAF

>SAEMRSA116620 putative polysaccharide biosynthesis protein

MSEKEMVRGTFILITISILITKVLGVLFIPFNYLIGGQENMAPFTYAYAPYNIAIAVATAGVPLAASKY  
VAKYNAIGAYKVSQKFYKSSFIVMSITGVLGFLVLYFLAPYISELTARNVHDKNGWSVDDITWIIRIS  
MVVIFIPVLATWRGIFQGYKSMGPTAVSEVTEQIARVIFILIGSYLVNLFVDFGSILLANGIATFAAAVGA  
IIGIFTLWYYWRKRKHNDRMVESDYTDIDVSYGKMYEIIAYSIPFVIVSLNYPLFNLVDQFTHNGALS  
LVGIPSQLQDIFFNMLNMSTNKIVMIPTSLSAGFAVSLIPYITKTFAGRLHEMHQIRTSIGVLMFITV  
PASIGIMALAQLFTVYGYDPIVLGHDPNHGSRLLFYAPVAILISLVSATASMLQGIDKQKLTVYVI  
LASVVIKALNYPILMLFHTPGAILSTSIALLFAIGCNFYILKKYAKFKFSYSWIHFKAIFLYSFIMMLG  
VELVFFLANLFLEPTKLGYLIILGVTGILYGTITIKTRLADEFLEIPEKLRVRVFLR

>SAEMRSA116750 riboflavin biosynthesis protein

MQFDNIDSALMALKNGETIIVVDENRENEGDLVAVTEWMNDNTINFMAKEARGLICAPVSKDIAQRDL  
VQMVDNDSIDFGTQFTVSIHDVDTTGISAYERLTAKKLDPSEAKDFNRPGHLFPLVAQDKGVLARN  
GHTEAAVDLAKLTGAKPAGVICEIMNDDGTMAKGQDLQKFKEKHQLKMITIDDLIEYRKLEPEIEFKAK  
VKMPTDFGTFDMYGFKATYTDEEIVLTKGAIRQHENVRLHSACLTGDFHSQRCDCAQLESSMKYINE  
HGGMIYLPQEGRGIGLLNKLRAYELIEQGYDVTANLALGFDEDLRDYHIAAQILKYFNIEHINLLSNN  
PSKFEGLKQYGIDIAERIEVIVPETVHNHDYMETKKIKMGHLI

>SAEMRSA116760 riboflavin synthase alpha chain

MFTGIVEIGVVKSVQIRQSVRTIEIEAHKITADMHIGDSISVNGACLTVIDFNQTSFTVQVIKGTENKT  
YLADVKKRQSEVNLERAMSGNGRFGGHFVLGHVDELGTVSKINETANAKIITIQCQSHINNQLVKQGSITV  
DGVSLTVFDKHDNSFDIHLIPETRRTILSSKKLGDKVHLETDVLFKYVENILNKDKDQLSVDKLRAFGF

>SAEMRSA117370 ferrochelatase

MTKKMGLLVMAYGTPYKESDIEPYTDIRHGKRPSEELQDLKDRYEFIGGLSPLAGTTDDQADALVSAL  
NKAYADVEFKLYLGLKHISPFIEDAVEQMHNNDGITEAITVVLAPHYSSFSVGSYDKRADEEAAKYGIQLT  
HVKHYYEQPKFIEYWTNKVNETLAQIPEEEHKDVLVVSASLPGKGLIEKNNDPYPQLEHTALLIKEQS  
NIEHIAIGWQSEGNTGTPWLGPDPVQDLTRDLYEKHQYKNFIYTPVGFVCEHLEVLYDNDYECKVVCDDIG  
ANYRPMKMPNTHPLFIGAIVDEIKSF

>SAEMRSA117980 conserved hypothetical protein

MHELTIIYHMSDKLNLYSDIGNIILRQRAKKRNKVNVEINETEGITFDECDIFFIGGSDREQALAT  
KELSKIKTPLKEAIEDGMPGLTICGGYQFLGKKYITPDGTELEGLGILDYTESKTNRLTGDIVIESDTF  
GTIVGFENHGGRTYHDFGLGHVTFGYGNDEDEKKEGIHYKNLLGTYLHGPIPKNYEITDYLLEKACER  
KGIPFEPKEIDNEAEIQAKQVLIDRANRQKKS

>SAI7S6 1014340 Putative PF08353 domain protein

LRNFFEVALSCYNDAAGNLRKHMQRQWTAIHLAKLARKASRAVGKRGTDLPGQIARKVDTDLVRKLAEQV  
DDIVISGTNGKTTTSLNIGHTLKANNIQUIHNNEGANMAAGITSAFIMQSTPKTKIAVIEIDEGSIPRV  
LKEVTPSMVMFTNFRDQMDRFGEIDIMVNIAETISNKGILLNADDPFVSRLKIASDTIVYYGMKAH  
AHEFEQSTMNESRYCPNCGRLLQYDIHYNQIGHYHCQCGFKREQAKYEISSFDVAPFLYLNINDEKYDM  
KIAGDFNAYNALAAYTVLRELGLNEQTIKNGFETYSDNGRMQYFKKERKEAMINLAKNPAGMNASLSVG  
EQLEGEKVVYISLNDNAADGRDTSWIYDADFEKLSKQKQIEAIIVTGTRAEELQLRLKLAEEVPIIVERD  
IYKATAKTMIDYKGFTVAIPNYTSLAPMLEQLNRSFEGGQS

>SAEMRSA118290 manganese-dependent inorganic pyrophosphatase

LTMAKTYIFGHKNPDTDAISSAIIMAEFEQLRGNSGAKAYRLGDVSAETQFALDTFNVPAPELLTDDLGDG  
QDVILVDHNEFQQSSDTIASATIKHVIDHHRIANFETAGPLCYRAEPVGCTATILYKMFRERGFEIKPEI  
AGLMLSIIISDSLLFKSPTCTQQDVKAAEELKDIKVDIQKYGLDMLKAGASTTDKSVFLLNMDAKSFT  
MGDYVTRIAQVNAVDLDEVLRNKEDLEKEMLAVSAQEKYDLFVLVTDIINSKILVVGAEKDKVGEAF  
NVQLEDDMAFLSGVVSRRKKIVPQITEALTK

>SAV2051 similar to glycoprotein endopeptidase

MNKLRRQLSMNSLLIDTSNQPLSVALMQNDEVLAEITTDKQNHVSQVLMPAISQLFEQSKIAKQQLDAII  
VAEGPGSYTGLRIGVTAKTLAYALDVKLYGVSSSLKALAATIDHTDKLLVPVFDARRQAVYTGFQWQNG  
QLVTILEDQYMSIEALRAFLEDLNQPFYIYGKDTIKLQDELQGEVIAQLPNASVMYQLIDKPTDVHTFTP  
KYHKLAEERNWINSQKNN

>SAEMRSA119600 conserved hypothetical protein

MNEKHNIGESTLIKINNLDENMQAMFLVEQLKSGDLILLNGDLGAGKTTLTQFIGKALGVRRTINSPTF  
NIIKSYRGKNLKHMHMDCYRLEDSDLEDLGFDEFEDQAITVIEWSQFIKDLLPSTHLSINISTISENTRQ  
IELFAQGEHYEQIKEAIIHEFAAH

>SAI7S6 1015240 Alanine racemase

VGITGGSNMDSKYRSAYMNVDLNAVASNFKVFSTLHPNKTVMMAVVKANAYGLGSVKVARHLMENGATFF  
AVATLDEAIELRMHGITAKILVLGVLPKADIDKAIQHRVALTVPSKQWLKEAIKNISGEQEKKLWLHIKL  
DTGMGRGLIKDNTYQEVIEIIQQYEQLVFEGVFTHFACADEPGDMTTEQYQRFKDMVNEAIKPEYIHCQ  
NSAGSLLMDCQCFNAIRPGISLYGYYPSEYVQKVKVHLKPSVQLIANVVQTKTLQAGESVSYGATYTAT  
DPTTIALPIGYADGYLRIMQGSFVNNGHQCEVIGRVCMDQTIVKVPDQVKAGDSVILIDNHRESPQSV  
EVVAEKQHTINYEVLNLSRRLPRIYHGDGQRFVTNELLK

>SAEMRSA119910 putative UDP-N-acetylmuramoylalanyl-D-glutamyl-2, 6-diaminopimelate--D-alanyl-D-alanyl ligase

MINVTLKQIQSWIPCEIEDQFLNQEINGVTIDSRAISKNNMLFIPFKGENVDGHRFVSKALQDGAGAAFYQ  
RGTPIDENVSGPIIWVEDTLTALQQLAQAYLRHVNPVKVIAVTGSNGKTTTKDMIESVLHTEFKVKKTQGN  
YNNEIGLPLTILELDNDTEISILEMGMSGFHEIEFLSNLAQPDIAVITNIGESHMQDLGSREGIAKAKSE  
ITIGLKDNFTFIYDGDPELLKPHVKEVENVKCISIGVAADNALVCSVDDRTTGISFTINNKEHYDLPIL  
GKHNMKNATIAIAGVHELGLTYNTIYQNLKNVSLTGMRMEQHTLENDITVINDAYNASPTSMRAAIDTSL  
TLTGRRILILGDVLELGENSEMHISVGNYLEEKHIDVLYTFGNEAKYIYDSGQQHVEKAQHFNKDDMI  
EVLTSDLKAHDRVLVKGSRGMKLEEVNALIS

>SAI7S6 1015360 D-alanine--D-alanine ligase

VILLRFKDKANSINNRTKSILYIKVANPDISLEENEMTKENICIVFGGKSAEHEVSILTAQNVNLNAIDK  
DKYHVDIIYITNDGDWRKQNNITAEIKSTDELHLENGEALISQLLKESSSGQPYDAVFPLLHGPNGEDG  
TIQGLFEVLDPYVGVNGVLSAASSMDKLVMMKQLFEHRLPQLPYISFLRSEYEKYEHNILKLVNDKLNYP  
VFKPANLGSVSGSKCNNEAELKEGIKAFQFDRKLVIEQGVNAREIEVAVLGNDYPEATWPGEVVKDV  
AFYDYKSKYKDGKVQLQIPADLDEVDQLTLRNMALEAFKATDCSGLVRADFFVTEDNQIYINETNAMPGF  
TAFSMYPKLWENMGLSYPELITKLIELAKERHQDKQKNKYKID

>SAEMRSA119990 putative membrane protein

MKKKALLPLFLGIMVFLAGCDYSKPEKRSGFFYNTFVDPMKNVLDWLGNLLNDNYGLAIIILVLVIRII  
LLPFMLSNYKNSHMMRQKMKVAKPEVEKIQEKVKRARTQEEKMAANQELMQVYKKYDMNPIKSMGLCLPM  
LIQLPIIMGLYFVLKDQLVDGLFKYPHFLWFDLGRPDIIWITIIAGVLYFIQAYVSSKTMPEQRQMGYMM  
MVISPIMIIWISLASALGLYWSVSAFLVVQTHFANIYIEKVAKKEVQPFIEAYEREHNGGSNKKGKN  
TQVVSKKKKK

>SAEMRSA120080 putative UDP-N-acetylglucosamine 1-carboxyvinyltransferase

MDKIVIKGGNKLTGEVKVEGAKNVLPILTASLLASDKPSKLVNVPALSDVETINNVLTTLNADVITYKKD  
ENAVVVDATKTLNEEAPYEYVSKMRASILVMGPELLARLGHAIVALPGGCAIGSRPIEQHIKGFEALGAEI



HLENGNIYANAKDGLKGTSHLDFPSVGATQNIIMAASLAKGKTLIENAAKEPEIVDLANYINEMGGRT  
GAGTDTITINGVESLHGVEHAIIPDRIEAGTLIAGAITRGDIFVRGAIKEHMASLVYKLEEMGVELDYQ  
EDGIRVRAEGLQPVDIKTLPHPGFPTDMQSQMMALLLTANGHKVVTETVFENRFMHVAEFKRMNANINV  
EGRSAKLEKGSQQLGAQVKATDLRAAALILAGLVADGKTSVTELTHLDRGYVDLHGKQLGADIERIN  
D

>SAEMRSA120140 putative ATP synthase delta chain

MVKVANKYAKALFDVSLDTNNLETINQELTVINEAVKDKIEQLKMVDSNPTQTAEQRRELINGVFTDINP  
YIKNMMYVLADNRHISLIADVFKAQSLYNGHYNQDFATIESTYELSQEELDKIVKLVTQQTLSKVIVD  
TKINPDLIGGFRVKVGTTVLDGSRNDLVQLQRKFRRVN

>SAEMRSA120150 putative ATP synthase subunit b

VTETANLFVLGAAGGVWGTIVVQVLTFFVLLALLKKFAWGPKLDVMDKRERDINRDIDDAEQAKLNAQK  
LEEENKQKLKETEEVQKILEDAKVQARQQEQEIHEANVRANGMIETAQSEINSQKERAADINNQVSE  
LSVLIASKVLRKEISEQDQKALVDKYLKEAGDK

>SAEMRSA120170 ATP synthase subunit a

MDHKSPLVSWNLFGDFIVFLSSILMILVTAFLVFLAIICTRNLKKRPTGKQNFVEWIFDFVRGIIEN  
MAWKKGGQFHFLAVTLILYIFIANMLGLPFSIVTKDHTLWWKSPTADATVTLTLSTTIILLTHFYGIKMR  
GTKQYKGYVQPFWPLAIINVFEEFTSTLTGLRLYGNIFAGEILLTLAGLFFNEPAWGWIIISIPGLIV  
WQAFSIFVGTIQAYIFIMLSMVYMSHKVADEH

>SAEMRSA120330 putative tagatose-bisphosphate aldolase

MPLVSMKEMLIDAKENGYAVGQYNNLEFTQAILEASQEENAPVILGVSEGAARYMSGFYTIVKMVEGL  
MHDNLITIPVAIHLHDGSSFEKCKEADAGFTSVMIDASHSPFEENVATTKKVVEYAHEKGVSEAEELGT  
VGGQEDDVVADGIIYADPKCEQELVEKTGIDALAPALGSHGYPYKGEPLGFKEMEEIGLSTGLPLVLHG  
GTGIPTKDIQKAIPFGTAKINVTENQIASAKAVRDVLNNDKEVYDPRKYLGPAREAIKETVKGKIEFG  
TSNRAK

>SAEMRSA120690 putative membrane protein

MDFSNIFFQNLSTLKIVTSILDLLIVWVYLLITVFKGTAKIQLLKILVIVIGQQISMILNLTATSKLF  
DIVIQWGLALIVIFQPEIRRALEQLGRGSFLKRYTSNTYSKDEEKLIQSVSKAVQYMAKRRIGALIVFE  
KETGLQDIETGIAMDSNISQELLINVFIPNTPLHDGAMIIQGTKIAAAASYLPLSDSPKISKSLGTRHR  
AAVGISEVSDAFTVIVSEETGDISVTFDGKLRRDISNEIFEELLAEHWFGRFQKKGKGV

>SAEMRSA121190 putative cobalt transport protein

MKNKLIIGRYLPINSFVHLDPRAKLMFVFLFIILIFFCHSPLTYLWVFALILFFMRLAKIQLWFLIKGL  
TPIFFLIFTLMMHIFLTGGYVLVEWHGITIETNGILEGLYISRLIGIVMIATIMTLSTSPIDLTDAF  
ERLLAPLKMFKLPVHQLSMIMSIALRFIPTLMDELDKIILAQKSRGSEISSGNIATRIKSFIPLLVPLFI  
SAFQRAEELAVAMEVRGYDANVQRTSYRQLKWQLRDTLSLIMIIPFIIILFVLKYSKV

>SAEMRSA121290 preprotein translocase SecY subunit

MIQTLVNFFRTKEVRNKIFFTLAMLVIFKIGTYIPAPGVNPAAFDNPQGSQGATELLNTFTGGGALKRFSI  
FAMGIVPYITASIVMQLLQMDIVPKFSEWAKQGEVGRRLNNVTRYLAISLAFIQSIGMAFQFNYYLKGA  
LIINQSIMSULLIALVLTAGTAFLIWLGDQITQFGVGNISIIIFAGILSTLPASLIQFGQTAFVGQEDT  
SLAWLKVGLLLVSLILLTVGAIYVLEAVRKIPYAKKQTAQRLGSQATYLPKVNAGVIVFVIFAMAFF  
LLPRTLTLFPYDKEWAQNIANAANPSSNVGMVVYIVLIIIFTYFYAFVQVNPEKMADNLKKQGSYVPGIR  
PGEQTKKYITKVYRLTFVGSIFLAVISILPATKFMGLPQSIQIGGTSLLIVIGVAIETMKSLEAQVS  
QKEYKGFGR

>SAEMRSA121370 50S ribosomal protein L5

LNRLKEFNTEVTENLMKKFNYSVMEVPKIDKIVVNMGVGDAVQNSKVLDAVEEELITGQKPLVTKA  
KKSJATFRLREGMPIGAKVTLRGERMYEFLDKLISVSLPRVRDFQGVSKAFDGRGNYTLGVKEQLIFPE  
IDYDKVSKVRGMDIVIVTTANTDEEARELLANFGMPFRK

>SAEMRSA121430 30S ribosomal protein S3

VGQKINPIGLRVGIIRDWEAKWYAEKDFASLLHEDLKIRKFIDNELKEASVSHVEIERAANRINIAIHTG  
KPGMVGKGGSEIEKLRNKNLALTDKKVHINVIEIKVDLDARLVAENIARQLENRASFRVQKQAITRA  
MKLGAKGIKTQVSGRLGGADIARAEQYSEGTVPPLHTLRADIDYAHAEADTTYGKLGVKVWIYRGEVLP  
NTSGGGK

>SAEMRSA125010 putative pantoate--beta-alanine ligase

MTKLITTVKEMQHIVKAAKRS GTTIGFIPTMGALHDGHLTMVRESVSTNDITVVSFVNPLQFGPNEDFD  
AYPRQIDKDLELVSEVGADIVFHPAVEDMYPGELGIDVKVGPLADVLEGAKRPGHFDGVTVVNKLNFIV  
MPDYAYFGKKDAQQLAIVEQMVKDFNHAVEIIGIDIVREADGLAKSSRNYYL TEQERQEA VHLSKSLLA  
QALYQDGERQSKVIIDRVTEYLESHISGRIEEVAVSYSQLVEQHEITGRIFISLAVKFSKARLIDNIII  
GAE

>SAEMRSA125020 putative 3-methyl-2-oxobutanoatehydroxymethyltransferase

LKTVSQLIDMKQKQTKISMVTAYDFPSAKQVEAAGIDMILVGDSLGMTVLGYESTVQVTLADMIHHGRAV  
RRGAPNTFVVVDMPIGAVGISMTQDLNHALKLYQETNANAIAEGA HITPFIEKATAIGIPVVAHLGLTP  
QSVGVMGYKLQGATKEAAEQ LILDAKNVEQAGAVLVLEAIPNDLAE EISKHLTIPVIGIGAGKGTGQV  
LVYHDM LNYGEHKA FVKQFADF SVGVDGLKQYDQEVKSGAFPSEEYTKKKIMNEVNNND

>SAI7S6 1018940 Hydroxymethylglutaryl-CoA reductase

MSMQSLDKNFRHLRSRQKLQQLVDKQWLS EDQFDILLNHPLIDEEVANSLIENVIAQ GALPVGLLPNIIV  
DDKAYVVPMMVEEPSVVAASYGAKLVNQ TGGFKTVSSERIMIGQIVFDGVDDEKLSADIKALEKQIHK  
IADEAYPSIKARGGGYQRIADTFPEQQLSLKVFDTKDAMGANMLNTILEAITAFLKNESPQSDILMS  
ILSNHATASVVKVQGEIDVKDLARGERTGEEVAKRMERASVLAQVDIHRATHNKGVMNGIHAVV LATGN  
DTRGAEASAHAYASRDGQYRG IATWRYDQKRRLIGTIEVPMTLAIVGGGTVLPIAKASLELLNVDSAQ  
ELGHVVAAVGLAQNFACRALVSEGIQQGHMSLQYKSLAIVVGAKGDEIAQVAEALKQEPRANTQVAERI  
LQEIRQQ

>SAEMRSA121230 DNA-directed RNA polymerase alpha chain

MIEIEKPRIETIEISDAKF GFVVEPLERGYGTTLGNSLRILLSSLP GAAVKYIEIEGVLHEFSAVDN  
VVEDVSTIIMNIKQLALKIYSEEDKTEIDVRDEGEVTASDITHSDSEILNPELKIATVSKGGHLKIRL  
VANKGRGYALAEQNNTSDLP IGVIPVDSLSPVERVNYTVENTRVGQSSDFDKLTLDVWTNGSITPQESV  
SLAAKIMTEHLNIFVGLTDEAQNAEIMIEKEEDQKEKVLEMSIEELDLSVRSYNCLKRAGINSVQELADK  
SEADMMKVVRNLGRKSLEEVKYKLEDLGLGRKED

>RK77 010475threonylcarbamoyl-AMP synthase

VHSFLLYIMINKKGVIKLDTKIWDVREYNEDLQQYPKINEIKDIVLNGGLIGLPTETVYGLAANATDEEA  
VAKIYEAKGRPSDNPLIVHIHSDQLKDFTYILDAPVEKLMQAFWPGPISFILPKPGYLCRKVSGGLSS  
VAVRMPSHSVGRQLLQIINEPLAAPSANLSGRPSPTTFNHVYQDLNGRIDGIVQAEQSEEGLESTVLDCT  
SFPYKIARPGSITAAMITDILPNSITHADYNDTEQPIAPGMKYKHYPNTPLTIITDIESKIGNDGKDW  
SIAFIVPSNKVAFIPSEAQFIQLCQDDNDVKQASHNLYDVLHSLDENENISAAYIYG FELNDNTEAIMNR  
MLKAAGNHIVKGCEL

>SAEMRSA115480 histidyl-tRNA synthetase

MIKIPRGTDILPEDSKKWRYIENQLDELMTFYNYKEIRTPIFESTDLFARGVGDSTDVVQKEMYTFKDK  
GDRSITLRPEGTA AVRSYIEHKMQGNPNQPIKLYNGPMFRYERKQKGRYRQFNQFGVEAIGAENPSVD  
AEVLAMVMHIYQSFGLKHLKLVINSVGDMASRKEYNEALVKHFEPVIEHFCSDCQSR LHTNPMRILDCKV  
DRDKEAIKTAPRITDFLNEESKAYYEQVKAYLDDLGIPIYEDPNLVRGLDYTHAFELMMDNPNYDGA  
ITL CGGGRYNGLLELDGPSETGIGFALSIERLLALEEEGIELDIEENLDLFIVTMGDQADRYAVKLLN  
HLRHNGIKADKDYLRKIKGQMKQADRLGAKFTIVIGDQELENNKIDVKNMTTGESETIELDALVEYFKK

>SAEMRSA112890 dihydrofolate reductase type I

MTLSILVAHDLQRVIGFENQLPWHLPNDLKHVKKLSTGHTLVMGRKTFESIGKPLPNRRNVVLTSDTSFN

VEGVVDVIHSIEDIYQLPGHVFIFFGGQTLFEEMIDKVDDMYITAIEGKFRGDTFFPPYTFEDWEVTSSVEG  
KLDEKNTIPHTFLHLIRKK

>SAEMRSA110440 putative flavoprotein

MKKILLAVTGGAAYKADLTSLTQSGYEVRLMLTNHAQKFVTPLAFAQISRNAVYTTDTFIEENPSEIQ  
HIALGDWADAIIVAPATANTIAKLSVGIADDLVTSTLLATETPKFIAPAMNVHMYENKRTQQNINILKED  
GYHFIEPGSGFLACGYVAKGRMEELQIVSVIDAHFQNSNRLANSSFDKRALVTAGPTIEVIDPVRVFS  
NRSSGKMGYAI AEALNRNGAIVTLVAGPTTLEDPKDIEVIHVQSAEEMFEQVTSRFDEQDIVVKAASVSD  
YTPVDVLEHKMKKQDGLSVSFKRTKDILKYLGEHKTSQYLIGFAAETEDIENYAQQKLRRKNADVIIISN  
NVGDMSIGFSSDDNELTMHFKNNEKVNKKGKVVLAQILDELETRWQ

## Sequence 2: Non\_cytoplasmic\_localized\_proteins\_(PSE\_MEM\_proteins)

>SAEMRSA106090\_putative\_undecaprenol\_kinase

MFIIELIKGIILGVVEGLTEFAPVSTGHMILVDDMWLKSSEFLGSQSAFTFKIVIQLGSVFAAAWVFRE  
RFLEILHIGKHKHVEGENDQRRSKPRRLNLLHVLVGMVPAGILGLLFDFFIEEHLFSVPTVMIGLFVGA  
IYMIIADKYSKVNPKQTVDQINIFYQAFVIGISQAVAMWPGFSRSGSTISTGVLMKLNHKAASDFTFIMA  
VPIMLAASGLSLLKHQDIQIADIPFYILGFLAAFTVGLIAIKTFLHLINKIKLIPFAIYRIVLVIFIAI  
LYFGFGIGKGI

>SAEMRSA106730\_putative\_glycosyltransferase

MVTLLLVAVTMIVSLTITPVIASIKRLNLVDKPNFRKVHTKPIVSMGGTVILFSFLIGIWIGHPIETEI  
KPLIIGAIIMYVLGLVDDIYDLKPYIKLAGQIAAALVAFYGVITIDFISLPMGTTIHFGFLSIPITVIWI  
VAITNAINLIDGLDGLASGVSAIGLITIGFIAILQANIFITMICCVLLGSLIGFLFYNFHPAKIFLGDSG  
ALMIGFIIGFLSLLGFKNITIIALFFPILAVPFIDTLFAMIRRVKKQGHIMQADKSHLHHKLLALGYT  
HRQTVLLIYSISILFSLSSIILYVSPPLGVVLMFILIFSIELIVEFTGLIDNNYRPILNLISRKSSHKE  
D

>SAEMRSA110140\_penicillin-binding\_protein\_1

MAKQKIKIKKNIKIGAVLLVGLFGLLFFILVLRISYIMITGHSNGQDLVMKANEEKYLVKNAQQPERGKIYD  
RNGKVLAEADVERYKLVAVIDKKASANSKKPRHVVDKKETAKKLSTVIDMKPEEIEKRLSQKKAFQIEFGR  
KGTNLTYQDKLIEKMNLPGISLLPETERFYPNGNFASHLIGRAQKNPDTGELKGALGVEKIFDSYLSGS  
KGLSRYIHDWGYIAPNTKKEKQPKRGDDVHLTIDSNIQVFVEEALDGMVERYQPKDLFAVVMDAKTGEI  
LAYSQRPTFNPETGKDFGKKWANDLYQNTYEPGSTFKSYGLAAAIQEGAFDPDKKYSGHRDIMGSRISD  
WNRVGVGWEIPMSLGFTYSSNTLMMHLQDLVGADKMKSWEYERFGFGKSTKGMFDGEAPGQIGWSNELQQKT  
SSFGQSTTVTPVQMLQAQSAFFNDGNMLKPWFVNSVENPVSKRQFYKGQKQIAGKPITKDTAEKVEKQLD  
LVVNSKKSHAANYRIDGYEVEGKTGTAQVAAPNGGGYVKGPNPYFVSFMDAPKKNPKVIVYAGMSLAQK  
NDQEAYELGVSKAFKPIMENTLKYLVNKGSKDDTSNAEYSKVPDVEGQDKQAIDNVSASLEPVTIGTG  
TQIKAQSIKAGNKVLPKSVLLLTGDLTMDMTGWTKEDVIAFENLTNIKVNKLGSGFVSHQSISKGQK  
LTEKDIDVEFSSENVDSNSTNSDSNSDDKKKSDSKTDKDKSD

>SAEMRSA110150\_phospho-N-acetylmuramoyl-pentapeptide-transferase

MIFVYALLALVITFVLVPVLIPTLKRMMKFGQSIREEGPQSHMKKTGTPTMGGLTFLLSIVITSLVAIIFV  
DQANPIILLFVTIGFGLIGFIDDIIVVKNNQGLTSKQKFLAQIGIAIIFVLSNVFHLVNFSTSIHI  
PFTNVAIPLSFAYVIFVWQVGSNAVNLTLDGLDGLATGLSIIGFTMYAIMSFVLGETAIGIFCIIMLF  
ALLGFLPYNINPAKVMFGDTGSLALGGIFATISIMLNQELSLIFIGLVFVIETLSVMLQVASFKLTGKRI  
FKMSPIHHHFFELIGWSEWKVVTVFWAVGLISGLIGLWIGVH

>SAEMRSA110290\_lipoprotein\_signal\_peptidase

MHKKYFIGTSILIAVFFVIFDQVTKYIIATTMKIGDSFEVIPHFLNITSHRNNGAAWGILSGKMTFFFI  
TIILIALVYFFIKDAQYNLFMQVAISLLFAGALGNFIDRILTGEVVDIFDITNIFGYDFPIFNADSSLT

IGVILIIIIALLKDTSNKKEKEVK

>SAEMRSA112010\_putative\_membrane\_protein

MMIIVMLLSYLIGAFPSGFVIGKLFKKDIRQFGSGNTGATNSFRVLGRPAGFLVTFIDFKGFITVFF  
PLWLPVHADGPSTFFTNGLIVGLCAILGHVYPVYLKQGGKAVATSAGVVLGVNPILLILAIFFVVL  
KIFKYVSLASIVAAICCVIGSLIIQDYILLVVSFLVSIILIRHRSNIARIFRGEPEKIKWM

>SAEMRSA112810\_putative\_UDP-N-acetylglucosamine-N-acetylmuramyl-(pentapeptide)pyr\_o-phosphoryl-undecaprenol\_N-acetylglucosamine\_transferase

MKKIAFTGGGTGVGHVSVNLSLIPTALSQGYEALYIGSKNGIEREMIESQLPEIKYYPISSGKLRRYISLE  
NAKDVFVKLGILDARKVLKKEKPDLLFSKGGFVSPVVIAAKSLNIPTIIHESDLTPGLANKIALKFAK  
KIYTTFEETLNYLPKEKADFIGATIREDLKNGNAHNGYQLTGFNENKKVLLVMGGSLGSKKLNSIIRENL  
DALLQQYQVIHLTGKGLKDAQVKKSGYIQYEFVKEELTDLLAITDTVISRAGSNAIYEFLLRIPMLLVP  
LGLDQSRGDQIDNANHFAKGYAKAIDEEQLTAQILLQELNEMEQUERTRIINNMSYEQSYTKEALFDKM  
IKDALN

>SAEMRSA113110\_penicillin-binding\_protein\_2

MTENKGSSQPKKNGNNGGKSNSKKNRNVKRTIIKIIGFMIIAFFVLLLGILLFAYYAWKAPAFTEAKLQ  
DPIPAKIYDKNGELVKLTLDNGQRHEHVNLKDVPKSMKDAVLATEDNRFYEHGALDYKRLFAGIGNLTGG  
FGSEGASTLTQQVVKDAFLSQHKSIGRKAQEAYLSYRLEQEYSKDDIFQVYLNKIYSDGVTGIKAAKY  
YFNKDLKDLNLAAEAYLAGLPQVPNNYNIYDHPKAAEDRKNTVLYLMHYHKRITDKQWEDAKKIDLKANL  
VNRTAEERQNIDTNQDSEYNSYVNFVKSELMNNKAFKDENLGNVLQSGIKIYTNMDKDVQKTLQNDVDNG  
SFYKNKDQQVGATILDSKTGGLVAISGGRDFKDVVNRNQATDPHTGSSSLKFLAYGPAIENMKWATNHA  
IQDESSYQVDGSTFRNYDVKSHGTYSIYDALRQSFNIPALKAWQSVKQNAAGNDAPKKFAAKLGLNYEGDI  
GPSEVLGGSASEFSPTQLASAFAAIANGGTYNNAHSIQKVVRDGETIEYDHTSHKAMSDYTAYMLAEML  
KGTFFKPYGSAYGHGVSGVNMGAKTGTGTGYAETYSQYNLPDNAAKDVWINGFTPQYTMSSVWVGFSKVKQY  
GENSFVGHSSQEQEYPQLFYENVMKISSRDGEDFKRPSSVSGSIPSINVSGSQDNNTNRSAGGSDTSAN  
SSGTAQSNNNTRSQQSRNSGGLTGIFN

>SAEMRSA115170\_conserved\_hypothetical\_protein

MGLVRKFFMPNSYVQSIFQIDLDKLVDKGVKGIITDLNTLVGWDVKEPTERVKAWFKEANEKGITITIV  
SNNNESRVASFQHLIDIDIFKARKPMGKAFDKAITKMNIRPDQTVVIGDQMLTDVFGGNRRGLYTIMV  
PVKRTDGFITKFNRLIERLLRHFSKKGYITWEEN

>SAEMRSA115540\_putative\_protein-export\_membrane\_protein

VKKSSRIIAFLLLVLLFAGMAATYKSVIKNVNLGLDLQGGFEVLYQVDPLNKGDKIDKKALQSTAQTLE  
NRNVNLGVSEPKIQVEPNRIRVQLAGVTDQNEARKILSSQANLTIRDAEDKVKLGSDDIKQGSQAKQEFK  
QETNQPTVTFKVKDNKFKKVTETEEKSRDNDVMVWLDFFKKGDSYKKEAQKKNPKFISAASVDQPINSDS  
VEISGGFGKGQEGVKKAKQIAELLNAGSLPVDLKEIYSNSVGAQFGQDALDKTVFASFVIGVALIYLFMLGF  
YRLPGLVAIIALTTYIYLTAVAFNFIISGVLTPGLAALVLGVGMAVDANIIMYERIKDELIRIGRTIKQAF  
SKANKSSFLTIFDSNLTTVIAAAVLFFGESSVKGFATMLLLGILMIFVTAVFLSRFLLSLLVSSNIFKN  
QFWLFGVKKNRHDINEGVVDHDLKTSFEKWNFVKLAKPLIGVSILIVVGLVILYIFKLNLDGIDFSSGT  
RVDFQSKQAITQQKVEQVVKDSGLKADQIQINGKDNKVATVQFKDDLTRAQDNKLSDNKSKFGDTPQIN  
TVSPIIGQELAKNAMLALIYASIGIIIVSLRFEWRMGLSSVLALLHDVFIIAIFSLFRIEVDLTFIAA  
VLTIVGYSINDTIVTFDRVRENQKVKVITTEQIDDIVNRSIRQTMTRSINTVLTIVVVVAILFFGAP  
TIFNFTLALFIGLISGVFSSIFIAVPLWGIMKKRQLKSPKHKLVVYKEKKSNDKILV

>SAEMRSA116620\_putative\_polysaccharide\_biosynthesis\_protein

MSESEKEMVRGTFLITISILITKVLGVLFIPFNYLIGGQENMAPFTYAYAPYNIAIATAGVPLAASKY  
VAKYNAIGAYKVSQKFYKSSFIVMSITGVLGFLVLYFLAPYISELTARNVHDKNGWSVDDITWIIRIIS  
MVVIFIPVLATWRGIFQGYKSMGPTAVSEVTEQIARVIFILIGSYLVNLNVDGSSILLANGIATFAAAVGA  
IIGIFTLWYWRKRKHNIDRMVESDYTDIDVSYGKMYKEIIAYSIPFVIVSLNYPFLNLDQFTHNGALS  
LVGIPSQLQDIFFNMLNMSTNKIVMIPTSLSAGFAVSLIPYITKTFAGRLHEMHQIRTSIGVLMFITV  
PASIGIMALAQPLTFVYGYDPIVLGHDPNHGSRLLFYAPVAILISLVSMTASMLQGIDKQKLTIVYVI

LASVVIKALALNYPLIMLFHTPGAILSTSIALLFAIGCNFYILKKYAKFKFSYSWIHFACIFLYSFIMMLG  
VELVFFLANLFLEPTKLGYLIIILGVTVGILYGTITIKTRLADEFLGEIPEKLRRRVFLR

>SAEMRSA117460\_putative\_peptidyl-prolyl\_cis-isomerase  
MKMINKLIVPVATASALLGACGASATDSKENTLISSKAGDVTVADTMKKIGKDQIANASFTEMLNKILAD  
KYKNKVNDKKIDEQIEKMQKQYGGKDKFEKALQQGLTADKYKENLRTAAYHKELLSKIKISDSEIKED  
SKKASHILIKVSKSKSDEGLDDKEAKQKAEIQKEVSKDPSKFGEIAKKESMDTGSAKKDGEVLYLKG  
QTDKDFEKALFKLDGEVSDVVKSSFGYHIIKADKPTDFNSEKQSLKEKLVQKQKPNKLLTDAYKDLL  
KEYDVDFKDRDIKSVVEDKILNPEKQGGAGGQSGMSQ

>SAEMRSA119930\_putative\_membrane\_protein  
MNYSSRQQPDKHWLRKVDVVLVATIAVLAIKSVLLINSAMGGGQYSANFGIRQIFYYLGAIFAGIIMFI  
SPKKIKHYTYLLYFLICLLIGLLVIPESPIPIINGAKSWYTFGPISIQSEFMKILILALARVVSRLH  
NQFTFNKSFQSDLLFFKIIGVSLVPSILILLQNDLGTTLVLAIIAGVMLVSGITWRILAPIFITGIVG  
AMTVILGILYAPSLIENLLGVQLYQMGRINSWLDPTYSSGDGYHLSLKAIGSGQLLGKGYNHGEVYI  
PENHTDFIFSVIGELGFIGSVLILFLIFHLIRLAAKIEDQFNKIFIVGFVTLVLFHILQNIGMTI  
QLLPITGIPLPFISYGGGALWSMMTGIGIVLSIYYHEPKRYVDLYHPKSN

>SAEMRSA119990\_putative\_membrane\_protein  
MKKKALLPLFLGIMVFLAGCDYSKPEKRSFFYNTFVDPKMNVDWLGNLLNDNYGLAIIILVLVIRII  
LLPFMLSNYKNSHMMRQKMKVAKPEVEKIQEKVKRARTQEEKMAANQELMQVYKYDMNPIKSMGLCLPM  
LIQLPIIMGLYFVLKQDLVDGLFKYPHFLWFDLGRPDWITIAGVLYFIQAYVSSKTMPEQRRQMGYMM  
MVISPIIMIIWISLSSASALGLYWSVSAALVQTHFANIYYEKVAKKEVQPFIEAYEREHNGGSNKKGKN  
TQVVSKKKKK

>SAEMRSA120150\_putative\_ATP\_synthase\_subunit\_b  
VTETANLFLVLAAGGVWGTIVVQVLTFIVLLALLKKFAWGPLKDVMDKRERDINRDIDDAEQAKLNAQK  
LEEENKQKLKETQEEVQKILEDAKQVQARQQEQEIHEANVRANGMIETAQSEINSQKERAADINNQVSE  
LSVLIASKVLRKEISEQDQKALVDKYLKEAGDK

>SAEMRSA120170\_ATP\_synthase\_subunit\_a  
MDHKSPLVSWNLFGFDIVFNSSILMILVTAFLVFLAIICTRNLKKRPTGKQNFVEWIFDFVRGIIEGN  
MAWKKGQGFHFLAVTLILYFIANMLGLPFSIVTKDHTLWWKSPTADATVTLTSTIILLTHFYGIKMR  
GTKQYLKGYVQPFWPLAIIINVFEFTSTLTGLRLYGNIFAGEILLTLAGLFFNEPAWGWIIISIPGLIV  
WQAFSIFVGTIQAYIFIMLSMVYMSHKVADEH

>SAEMRSA120690\_putative\_membrane\_protein  
MDFSFFQNLSTLKIVTSILDLLIVWYVLYLLITVFKGTAKIQLLKILVIVIGQQISMILNLTATSKLF  
DIVIQWGVLAIVIFQPEIRRALEQLGRGSFLKRYTSNTYSKDEEKLIQSVKAVQYMAKRRIGALIVFE  
KETGLQDYIETGIAMDSNISQELLINVFIPNTPLHDGAMIIQGTKIAAAASYLPLSDSPKISLGLTRHR  
AAVGISEVSDAFTVIVSEETGDISVTFDGKLRRDISNEIFEELLAEHWFGRFQKKGVK

>SAEMRSA121190\_putative\_cobalt\_transport\_protein  
MKNKLIIGRYLPINSFVHHLDPRAKLMFVFLFIILIFFCHSPLTYLWVFALIFFMRLAKIQLWFLIKGL  
TPIFFFLIFTLMMHIFLTGGYVVLVEWHGITETNGILEGLYISLRIGIVMIATIMTLSTSPIDLTDAF  
ERLLAPLKMFKLPVHQLSMIMSIALRFIPTLMDELDKIILAQKSRGSEISSGNIATRIKSFIPLLVPLFI  
SAFQRAEELAVAMEVRGYDANVQRTSYRQLKWQLRDTLSLIMIIPFAIILFVLKYSKV

>SAEMRSA121290\_preprotein\_translocase\_SecY\_subunit  
MIQTLVNFFRTKEVRNKIFFTLAMLVIFKIGTYIPAPGVNPAAFDNPQGSQGATELLNTFGGGALKRFSI  
FAMGIVPYITASIVMQLQMDIVPKFSEWAKQGEVGRRLNNVTRYLAISLAFIQSIGMAFQFNYYLKGA  
LIINQSIMSYYLIALVLTAGTAFLIWLGDQITQFGVGNISIIIFAGILSTLPASLIQFGQTAFVGQEDT  
SLAWLKVGLLVSLILLTVGAIYVLEAVRKIPQYAKKQTAQRLGSQATYLPKVNAGVIPVIFAMAFF  
LLPRTLTLFYPDKQWQAQNIANAANPSSNVGMVVYIVLIIIFTYFYAFVQVNPEKMADNLKKQGSYVPGIR

PGEQTKKYITKVLYRLTFVGSIFLAVISILPILATKFMGLPQSIQIGGTSLLIVIGVAIETMKSLEAQVS  
QKEYKGFGGGR

>SAR081prolipoprotein\_diacylglyceryl\_transferase

MGGIVFNYIDPVAFNLGPLSVRWYGIIVGILLGYFVAQRALVKAGLHKDTLVDIIFYSALFGFIAARI  
YFVIFQWPYYAENPGEIkiWHGGIAIHGGLIGGFIAGVIVCKVKNLNPFQIGDIVAPSIILAQGIGRWG  
NFMNHEAHGGPVSRAFLEQLHLPNFIIENMYINGQYYHPTFLYESIWDVAGFIILVNIRKHLKLGETFFL  
YLTWYSIGRFFIEGLRTDSLMLTSNIRVAQLVSILLILISLIVYRRIKYNPPLYSKVGALPWPTRKVK

>EssA

MLMNSVIALTFLTASSNNGGLNIDVQQEEKRINNDLNQYDTTLFNKDSKAVNDAIAKQKKERQQQIKND  
MFQNPQASHSTRNLNETKKVLFKSNLEKTSSEDKSPYIQNKQEKKIFPYILMSVGAFTLGFFVIFSIHKGR  
RTKNESARKSNI
